# Supplementary material
Source: ML conference proceedings conference paper supplement (https://proceedings.neurips.cc/paper_files/paper/2020/hash/af94ed0d6f5acc95f97170e3685f16c0-Abstract.html)
Supplement: Supplementary file [file af94ed0d6f5acc95f97170e3685f16c0-Supplemental.pdf]

---

# Learning Augmented Energy Minimization via Speed Scaling

---

**Etienne Bamas\***

EPFL

Switzerland

etienne.bamas@epfl.ch

**Andreas Maggiori\***

EPFL

Switzerland

andreas.maggiori@epfl.ch

**Lars Rohwedder\***

EPFL

Switzerland

lars.rohwedder@epfl.ch

**Ola Svensson\***

EPFL

Switzerland

ola.svensson@epfl.ch

## Abstract

As power management has become a primary concern in modern data centers, computing resources are being scaled dynamically to minimize energy consumption. We initiate the study of a variant of the classic online *speed scaling* problem, in which machine learning predictions about the future can be integrated naturally. Inspired by recent work on learning-augmented online algorithms, we propose an algorithm which incorporates predictions in a black-box manner and outperforms any online algorithm if the accuracy is high, yet maintains provable guarantees if the prediction is very inaccurate. We provide both theoretical and experimental evidence to support our claims.

## 1 Introduction

Online problems can be informally defined as problems where we are required to make irrevocable decisions without knowing the future. The classical way of dealing with such problems is to design algorithms which provide provable bounds on the ratio between the value of the algorithm’s solution and the optimal (offline) solution (the competitive ratio). Here, no assumption about the future is made. Unfortunately, this *no-assumption* regime comes at a high cost: Because the algorithm has to be overly prudent and prepare for all possible future events, the guarantees are often poor. Due to the success story of machine learning (ML), a recent line of work, first proposed by Lykouris and Vassilvitskii [13] and Medina and Vassilvitskii [14], suggests incorporating the predictions provided by ML algorithms in the design of online algorithms. While some related approaches were considered before (see e.g. Xu and Xu [16]), the attention in this subject has increased substantially in the recent years [7, 8, 10, 11, 12, 13, 14, 15]. An obvious caveat is that ML predictors often come with no worst-case guarantees and so we would like our algorithm to be robust to misleading predictions. We follow the terminology introduced by Purohit et al. [15], where consistency is the performance of an algorithm when the predictor is perfectly accurate, while robustness is a worst case guarantee that does not depend on the quality of the prediction. The goal of the works above is to design algorithms which provably beat the classical online algorithms in the consistency case, while being robust when the predictor fails.

**Problem.** The problem we are considering is motivated by the following scenario. Consider a server that receives requests in an online fashion. For each request some computational work has to

---

\*Equal Contribution

be done and, as a measure of Quality-of-Service, we require that each request is answered within some fixed time. In order to satisfy all the requests in time the server can dynamically change its processor speed at any time. However, the power consumption can be a super-linear function of the processing speed (more precisely, we model the power consumption as  $s^\alpha$  where  $s$  is the processing speed and  $\alpha > 1$ ). Therefore, the problem of minimizing energy becomes non-trivial. This problem can be considered in the online model where the server has no information about the future tasks at all. However, this assumption seems unnecessarily restrictive as these requests tend to follow some patterns that can be predicted. For this reason a good algorithm should be able to incorporate some given predictions about the future. Similar scenarios appear in real-world systems as, for instance, in dynamic frequency scaling of CPUs or in autoscaling of cloud applications [4, 9]. In the case of autoscaling, ML advice is already being incorporated into online algorithms in practice [4]. However, on the theory side, while the above speed scaling problem was introduced by Yao et al. [17] in a seminal paper who studied it both in the online and offline settings (see also [2, 3]), it has not been considered in the learning augmented setting.

**Contributions.** We formalize an intuitive and well-founded prediction model for the classic speed scaling problem. We show that our problem is non-trivial by providing an unconditional lower bound that demonstrates: An algorithm cannot be optimal, if the prediction is correct, and at the same time retain robustness. We then focus on our main contribution which is the design and analysis of a simple and efficient algorithm which incorporates any ML predictor as a black-box without making any further assumption. We achieve this in a modular way: First, we show that there is a consistent (but not robust) online algorithm. Then we develop a technique to make any online algorithm (which may use the prediction) robust at a small cost. Moreover, we design general methods to allow algorithms to cope with small perturbations in the prediction. In addition to the theoretical analysis, we also provide an experimental analysis that supports our claims on both synthetic and real datasets. For most of the paper we focus on a restricted case of the speed scaling problem by Yao et al. [17], where predictions can be integrated naturally. However, we show that with more sophisticated algorithms our techniques extend well to the general case.

**Related work.** On the one hand, the field of learning augmented algorithms is relatively new, with a lot of recent exciting results (see for example Gollapudi and Panigrahi [7], Hsu et al. [8], Kodialam [10], Lattanzi et al. [11], Lee et al. [12], Lykouris and Vassilvitskii [13], Medina and Vassilvitskii [14], Purohit et al. [15], Xu and Xu [16]). On the other hand, the speed scaling problem proposed by Yao et al. in [17] is well understood in both the offline and online setting. In its full generality, a set of tasks each with different arrival times, deadlines, and workloads needs to be completed in time while the speed is scaled in order to minimize energy. In the offline setting Yao et al. proved that the problem can be solved in polynomial time by a greedy algorithm. In the online setting, in which the jobs are revealed only at their release time, Yao et al. designed two different algorithms: (1) the AVERAGE RATE heuristic (AVR), for which they proved a bound of  $2^{\alpha-1}\alpha^\alpha$  on the competitive ratio. This analysis was later proved to be asymptotically tight by Bansal et al. [3]. (2) The OPTIMAL AVAILABLE heuristic (OA), which was shown to be  $\alpha^\alpha$ -competitive in [2]. In the same paper, Bansal et al. proposed a third online algorithm named BKP for which they proved a competitive ratio asymptotically equivalent to  $e^\alpha$ . While these competitive ratios exponential in  $\alpha$  might not seem satisfying, Bansal et al. also proved that the exponential dependency cannot be better than  $e^\alpha$ . A number of variants of the problem have also been considered in the offline setting (no preemption allowed, precedence constraints, nested jobs and more listed in a recent survey by Gerards et al. [6]) and under a stochastic optimization point of view (see for instance [1]). It is important to note that, while in theory the problem is interesting in the general case i.e. when  $\alpha$  is an input parameter, in practice we usually focus on small values of  $\alpha$  such as 2 or 3 since they model certain physical laws (see e.g. Bansal et al. [2]). Although the BKP algorithm provides the best asymptotic guarantee, OA or AVR often lead to better solutions for small  $\alpha$  and therefore remain relevant.

## 2 Model and Preliminaries

We define the Uniform Speed Scaling problem, a natural restricted version of the speed scaling problem [17], where predictions can be integrated naturally. While the restricted version is our main focus as it allows for cleaner exposition and prediction models, we also show that our techniques

can be adapted to more complex algorithms yielding similar results for the general problem (see Section 3.4 for further extensions).

**Problem definition.** An instance of the problem can be formally described as a triple  $(w, D, T)$  where  $[0, T]$  is a finite time horizon, each time  $i \in \{0, \dots, T - D\}$  jobs with a total workload  $w_i \in \mathbb{Z}_{\geq 0}$  arrive, which have to be completed by time  $i + D$ . To do so, we can adjust the speed  $s_i(t)$  at which each workload  $w_i$  is processed for  $t \in [i, i + D]$ . Jobs may be processed in parallel. The overall speed of our processing unit at time  $t$  is the sum  $s(t) = \sum_i s_i(t)$ , which yields a power consumption of  $s(t)^\alpha$ , where  $\alpha > 1$  is a problem specific constant. Since we want to finish each job on time, we require that the amount of work dedicated to job  $i$  in the interval  $[i, i + D]$  should be  $w_i$ . In other words,  $\int_i^{i+D} s_i(t) dt = w_i$ . In the offline setting, the whole instance is known in advance, i.e., the vector of workloads  $w$  is entirely accessible. In the online problem, at time  $i$ , the algorithm is only aware of all workloads  $w_j$  with  $j \leq i$ , i.e., the jobs that were released before time  $i$ . As noted by Bansal et al. [2], in the offline setting the problem can be formulated concisely as the following mathematical program:

**Definition 1** (Uniform Speed Scaling problem). On input  $(w, D, T)$  compute the optimal solution for

$$\min \int_0^T s(t)^\alpha dt \quad s.t. \quad \forall i \int_i^{i+D} s_i(t) dt = w_i, \quad \forall t \sum_i s_i(t) = s(t), \quad \forall i \forall t s_i(t) \geq 0.$$

In contrast, we refer to the problem of Yao et al. [17] as the *General Speed Scaling* problem. The difference is that there the time that the processor is given to complete each job is not necessarily equal across jobs. More precisely, there we replace  $w$  and  $D$  by a set of jobs  $J_j = (r_j, d_j, w_j)$ , where  $r_j$  is the time the job becomes available,  $d_j$  is the deadline by which it must be completed, and  $w_j$  is the work to be completed. As a shorthand, we sometimes refer to these two problems as the *uniform deadlines* case and the *general deadlines* case. As mentioned before, Yao et al. [17] provide a simple optimal greedy algorithm that runs in polynomial time. As for the online setting, we emphasize that both the general and the uniform speed scaling problem are non-trivial. More specifically, we prove that no online algorithm can have a competitive ratio better than  $\Omega((6/5)^\alpha)$  even in the uniform case (see Theorem 9 in Appendix B). We provide a few additional insights on the performance of online algorithms for the uniform deadline case. Although the AVR algorithm was proved to be  $2^{\alpha-1} \cdot \alpha^\alpha$ -competitive by Yao et al. [17] with a quite technical proof; we show, with a simple proof, that AVR is in fact  $2^\alpha$ -competitive in the uniform deadlines case and we provide an almost matching lower bound on the competitive ratio (see Theorem 10 and Theorem 11 in appendix).

Note that in both problems the processor is allowed to run multiple jobs in parallel. However, we underline that restricting the problem to the case where the processor is only allowed to run at most one job at any given point in time is equivalent. Indeed, given a feasible solution  $s(t) = \sum_i s_i(t)$  in the parallel setting, rescheduling jobs sequentially according to the earliest deadline first (EDF) policy creates a feasible solution of the same (energy) cost where at each point in time only one job is processed.

**Prediction model and error measure.** In the following, we present the model of prediction we are considering. Recall an instance of the problem is defined as a time horizon  $[0, T]$ , a duration  $D$ , and a vector of workloads  $w_i, i = 1, \dots, T - D$ . A natural prediction is simply to give the algorithm a predicted instance  $(w^{\text{pred}}, T, D)$  at time  $t = 0$ . From now on, we will refer to the ground truth work vector as  $w^{\text{real}}$  and to the predicted instance as  $w^{\text{pred}}$ . We define the error  $\text{err}$  of the prediction as

$$\text{err}(w^{\text{real}}, w^{\text{pred}}) = \|w^{\text{real}} - w^{\text{pred}}\|_\alpha^\alpha = \sum_i |w_i^{\text{real}} - w_i^{\text{pred}}|^\alpha.$$

We simply write  $\text{err}$ , when  $w^{\text{real}}$  and  $w^{\text{pred}}$  are clear from the context. The motivation for using  $\alpha$  in the definition of  $\text{err}$  and not some other constant  $p$  comes from strong impossibility results. Clearly, guarantees for higher values  $p$  are weaker than for lower  $p$ . Therefore, we would like to set  $p$  as low as possible. However, we show that  $p$  needs to be at least  $\alpha$  in order to make a sensible use of a prediction (see Theorem 13 in the supplementary material). We further note that it may seem natural to consider a predictor that is able to renew its prediction over time, e.g., by providing our algorithm a new prediction at every integral time  $i$ . To this end, in Appendix D, we show how to naturally extend

all our results from the single prediction to the evolving prediction model. Finally we restate some desirable properties previously defined in [13, 15] that a learning augmented algorithm should have. Recall that the prediction is a source of unreliable information on the remaining instance and that the algorithm is oblivious to the quality of this prediction. In the following we denote by OPT the energy cost of the optimal offline schedule and by  $\varepsilon > 0$  a robustness parameter of the algorithm, the smaller  $\varepsilon$  is the more we trust the prediction.

If the prediction is perfectly accurate, i.e., the entire instance can be derived from the prediction, then the provable guarantees should be better than what a pure online algorithm can achieve. Ideally, the algorithm produces an offline optimal solution or comes close to it. By close to optimal, we mean that the cost of the algorithm (when the prediction is perfectly accurate) should be at most  $c(\alpha, \varepsilon) \cdot \text{OPT}$ , where  $c(\alpha, \varepsilon)$  tends to 1 as  $\varepsilon$  approaches 0. This characteristic will be called **consistency**.

The competitive ratio of the algorithm should always be bounded even for arbitrarily bad (adversarial) predictions. Ideally, the competitive ratio is somewhat comparable to the competitive ratio of algorithms from literature for the pure online case. Formally, the cost of the algorithm should always be bounded by  $r(\alpha, \varepsilon) \cdot \text{OPT}$  for some function  $r(\alpha, \varepsilon)$ . This characteristic will be called **robustness**.

A perfect prediction is a strong requirement. The consistency property should transition smoothly for all ranges of errors, that is, the algorithm's guarantees deteriorate smoothly as the prediction error increases. Formally, the cost of the algorithm should always be at most  $c(\alpha, \varepsilon) \cdot \text{OPT} + f(\alpha, \varepsilon, \text{err})$  for some function  $f$  such that  $f(\alpha, \varepsilon, 0) = 0$  for any  $\alpha, \varepsilon$ . This last property will be called **smoothness**.

Note that our definitions of consistency and robustness depend on the problem specific constant  $\alpha$  which is unavoidable (see Theorem 9 in the appendix). The dependence on the robustness parameter  $\varepsilon$  is justified, because no algorithm can be perfectly consistent and robust at the same time (see Theorem 12 in the appendix), hence a trade-off is necessary.

### 3 Algorithm

In this section we develop two modular building blocks to obtain a consistent, smooth, and robust algorithm. The first block is an algorithm which computes a schedule online taking into account the prediction for the future. This algorithm is consistent and smooth, but not robust. Then we describe a generic method how to robustify an arbitrary online algorithm at a small cost. Finally, we give a summary of the theoretical qualities for the full algorithm and a full description in pseudo-code. We note that in Appendix H and Appendix F we present additional building blocks (see Section 3.4 for an overview).

#### 3.1 A Consistent and Smooth Algorithm

In the following we describe a learning-augmented online algorithm, which we call LAS-TRUST.

**Preparation.** We compute an optimal schedule  $s^{\text{pred}}$  for the predicted jobs. An optimal schedule can always be normalized such that each workload  $w_i^{\text{pred}}$  is completely scheduled in an interval  $[a_i, b_i]$  at a uniform speed  $c_i$ , that is,

$$s_i^{\text{pred}}(t) = \begin{cases} c_i & \text{if } t \in [a_i, b_i], \\ 0 & \text{otherwise.} \end{cases}$$

Furthermore, the intervals  $[a_i, b_i]$  are non-overlapping. For details we refer the reader to the optimal offline algorithm by Yao et al. [17], which always creates such a schedule.

**The online algorithm.** At time  $i$  we first schedule  $w_i^{\text{real}}$  at uniform speed in  $[a_i, b_i]$ , but we cap the speed at  $c_i$ . If this does not complete the job, that is,  $w_i^{\text{real}} > c_i(b_i - a_i) = w_i^{\text{pred}}$ , we uniformly schedule the remaining work in the interval  $[i, i + D]$

More formally, we define  $s_i(t) = s'_i(t) + s''_i(t)$  where

$$s'_i(t) = \begin{cases} \min \left\{ \frac{w_i^{\text{real}}}{b_i - a_i}, c_i \right\} & \text{if } t \in [a_i, b_i], \\ 0 & \text{otherwise.} \end{cases}$$

and

$$s_i''(t) = \begin{cases} \frac{1}{D} \max\{0, w_i^{\text{real}} - w_i^{\text{pred}}\} & \text{if } t \in [i, i + D], \\ 0 & \text{otherwise.} \end{cases}$$

**Analysis.** It is easy to see that the algorithm is consistent: If the prediction of  $w_i^{\text{real}}$  is perfect ( $w_i^{\text{pred}} = w_i^{\text{real}}$ ), the job will be scheduled at speed  $c_i$  in the interval  $[a_i, b_i]$ . If all predictions are perfect, this is exactly the optimal schedule.

**Theorem 2.** *For every  $0 < \delta \leq 1$ , the cost of the schedule produced by the algorithm LAS-TRUST is bounded by  $(1 + \delta)^\alpha \text{OPT} + (12/\delta)^\alpha \cdot \text{err}$ .*

*Proof.* Define  $w_i^+ = \max\{0, w_i^{\text{real}} - w_i^{\text{pred}}\}$  as the additional work at time  $i$  as compared to the predicted work. Likewise, define  $w_i^- = \max\{0, w_i^{\text{pred}} - w_i^{\text{real}}\}$ . We use  $\text{OPT}(w^+)$  and  $\text{OPT}(w^-)$  to denote the cost of optimal schedules of these workloads  $w^+$  and  $w^-$ , respectively. We will first relate the energy of the schedule  $s(t)$  to the optimal energy for the predicted instance, i.e.,  $\text{OPT}(w^{\text{pred}})$ . Then we will relate  $\text{OPT}(w^{\text{pred}})$  to  $\text{OPT}(w^{\text{real}})$ .

For the former let  $s_i'$  and  $s_i''$  be defined as in the algorithm. Observe that  $s_i'(t) \leq s_i^{\text{pred}}(t)$  for all  $i$  and  $t$ . Hence, the energy for the partial schedule  $s'$  (by itself) is at most  $\text{OPT}(w^{\text{pred}})$ . Furthermore, by definition we have that  $s_i''(t) = w_i^+/D$ . In other words,  $s_i''$  is exactly the AVR schedule on instance  $w^+$ . By analysis of AVR, we know that the total energy of  $s_i''$  is at most  $2^\alpha \text{OPT}(w^+)$ . Since the energy function is non-linear, we cannot simply add the energy of both speeds. Instead, we use the following inequality: For all  $x, y \geq 0$  and  $0 < \gamma \leq 1$ , it holds that  $(x + y)^\alpha \leq (1 + \gamma)^\alpha x^\alpha + \left(\frac{2}{\gamma}\right)^\alpha y^\alpha$ . This follows from a simple case distinction whether  $y \leq \gamma x$ . Thus, (substituting  $\gamma$  for  $\delta/3$ ) the energy of the schedule  $s$  is bounded by

$$\begin{aligned} \int (s'(t) + s''(t))^\alpha dt &\leq (1 + \delta/3)^\alpha \int s_i'(t)^\alpha dt + (6/\delta)^\alpha \int s_i''(t)^\alpha dt \\ &\leq (1 + \delta/3)^\alpha \text{OPT}(w^{\text{pred}}) + (12/\delta)^\alpha \text{OPT}(w^+). \end{aligned} \quad (1)$$

For the last inequality we used that the competitive ratio of AVR is  $2^\alpha$ .

In order to relate  $\text{OPT}(w^{\text{pred}})$  and  $\text{OPT}(w^{\text{real}})$ , we argue similarly. Notice that scheduling  $w^{\text{real}}$  optimally (by itself) and then scheduling  $w^-$  using AVR forms a valid solution for  $w^{\text{pred}}$ . Hence,

$$\text{OPT}(w^{\text{pred}}) \leq (1 + \delta/3)^\alpha \text{OPT}(w^{\text{real}}) + (12/\delta)^\alpha \text{OPT}(w^-).$$

Inserting this inequality into (1) we conclude that the energy of the schedule  $s$  is at most

$$\begin{aligned} &(1 + \delta/3)^{2\alpha} \text{OPT}(w^{\text{real}}) + (12/\delta)^\alpha (\text{OPT}(w^+) + \text{OPT}(w^-)) \\ &\leq (1 + \delta)^\alpha \text{OPT}(w^{\text{real}}) + (12/\delta)^\alpha \cdot \text{err}. \end{aligned}$$

This inequality follows from the fact that the error function  $\|\cdot\|_\alpha^\alpha$  is always an upper bound on the energy of the optimal schedule (by scheduling every job within the next time unit).  $\square$

### 3.2 Robustification

In this section, we describe a method ROBUSTIFY that takes any online algorithm which guarantees to complete each job in  $(1 - \delta)D$  time, that is, with some slack to its deadline, and turns it into a robust algorithm without increasing the energy of the schedule produced. Here  $\delta > 0$  can be chosen at will, but it impacts the robustness guarantee. We remark that the slack constraint is easy to achieve: In Appendix E we prove that decreasing  $D$  to  $(1 - \delta)D$  increases the energy of the optimum schedule only very mildly. Specifically, if we let  $\text{OPT}(w^{\text{real}}, (1 - \delta)D, T)$  and  $\text{OPT}(w^{\text{real}}, D, T)$  denote the costs of optimal schedules of workload  $w^{\text{real}}$  with durations  $(1 - \delta)D$  and  $D$ , respectively, then:

**Claim 3.** *For any instance  $(w^{\text{real}}, D, T)$  we have that  $\text{OPT}(w^{\text{real}}, (1 - \delta)D, T) \leq \frac{1}{(1 - \delta)^{\alpha - 1}} \text{OPT}(w^{\text{real}}, D, T)$ .*

Hence, running a consistent algorithm with  $(1 - \delta)D$  will not increase the cost significantly. Alternatively, we can run the online algorithm with  $D$ , but increase the generated speed function by  $1/(1 - \delta)$

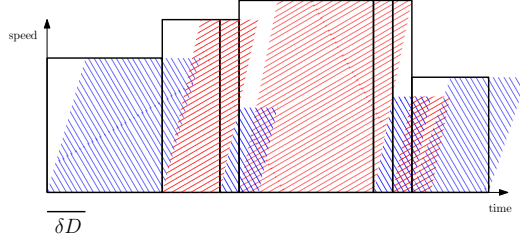

Figure 1: A schedule and its convolution.

and reschedule all jobs using EDF. This also results in a schedule where all jobs are completed in  $(1 - \delta)D$  time.

For a schedule  $s$  of  $(w^{\text{real}}, (1 - \delta)D, T)$  we define the  $\delta$ -convolution operator which returns the schedule  $s^{(\delta)}$  of the original instance  $(w^{\text{real}}, D, T)$  by

$$s_i^{(\delta)}(t) = \frac{1}{\delta D} \int_{t-\delta D}^t s_i(r) dr$$

for each  $i \in T$  (letting  $s_i(r) = 0$  if  $r < 0$ ). See Figure 1 for an illustration. The name comes from the fact that this operator is the convolution of  $s_i(t)$  with the function  $f(t)$  that takes value  $1/(\delta D)$  if  $0 \leq t \leq \delta D$  and value 0 otherwise.

Next we state three key properties of the convolution operator, all of which follow from easy observations or standard arguments that are deferred to Appendix G.

**Claim 4.** *If  $s$  is a feasible schedule for  $(w^{\text{real}}, (1 - \delta)D, T)$  then  $s^{(\delta)}$  is a feasible schedule for  $(w^{\text{real}}, D, T)$ .*

**Claim 5.** *The cost of schedule  $s^{(\delta)}$  is not higher than that of  $s$ , that is,*

$$\int_0^T (s^{(\delta)}(t))^\alpha dt \leq \int_0^T (s(t))^\alpha dt.$$

Let  $s_i^{\text{AVR}}(t)$  denote the speed of workload  $w_i^{\text{real}}$  of the AVERAGE RATE heuristic, that is,  $s_i^{\text{AVR}}(t) = w_i^{\text{real}}/D$  if  $i \leq t \leq i + D$  and  $s_i^{\text{AVR}}(t) = 0$  otherwise. We relate  $s_i^{(\delta)}(t)$  to  $s_i^{\text{AVR}}(t)$ .

**Claim 6.** *Let  $s$  be a feasible schedule for  $(w^{\text{real}}, (1 - \delta)D, T)$ . Then  $s_i^{(\delta)}(t) \leq \frac{1}{\delta} s_i^{\text{AVR}}(t)$ .*

By using that the competitive ratio of AVERAGE RATE is at most  $2^\alpha$  (see Appendix B), we get

$$\int_0^T (s^{(\delta)}(t))^\alpha dt \leq \left(\frac{1}{\delta}\right)^\alpha \int_0^T (s^{\text{AVR}}(t))^\alpha dt \leq \left(\frac{2}{\delta}\right)^\alpha \text{OPT}.$$

We conclude with the following theorem, which follows immediately from the previous claims.

**Theorem 7.** *Given an online algorithm that produces a schedule  $s$  for  $(w^{\text{real}}, (1 - \delta)D, T)$ , we can compute online a schedule  $s^{(\delta)}$  with*

$$\int_0^T (s^{(\delta)}(t))^\alpha dt \leq \min \left\{ \int_0^T (s(t))^\alpha dt, \left(\frac{2}{\delta}\right)^\alpha \text{OPT} \right\}.$$

### 3.3 Summary of the Algorithm

By combining LAS-TRUST and ROBUSTIFY, we obtain an algorithm LAS (see Algorithm 1) which has the following properties. See Appendix A for a formal argument.

**Theorem 8.** *For any given  $\varepsilon > 0$ , algorithm LAS constructs a schedule of cost at most  $\min \left\{ (1 + \varepsilon) \text{OPT} + O\left(\frac{\alpha}{\varepsilon}\right)^\alpha \text{err}, O\left(\frac{\alpha}{\varepsilon}\right)^\alpha \text{OPT} \right\}$ .*

---

**Algorithm 1** LEARNING AUGMENTED SCHEDULING (LAS)

---

**Input:**  $T$ ,  $D$ , and  $w^{\text{pred}}$  initially and  $w^{\text{real}}$  in an online fashion

**Output:** A feasible schedule  $(s_i)_{i=0}^{T-D}$

Let  $\delta > 0$  with  $(\frac{1+\delta}{1-\delta})^\alpha = 1 + \varepsilon$ .

Compute optimal offline schedule for  $(w^{\text{pred}}, T, (1-\delta)D)$  where the jobs  $w_i^{\text{pred}}$  are run at uniform speeds  $c_i$  an disjoint intervals  $[a_i, b_i]$  using [17].

**on arrival of  $w_i^{\text{real}}$  do**

$$\text{Let } s'_i(t) = \begin{cases} \min \left\{ \frac{w_i^{\text{real}}}{b_i - a_i}, c_i \right\} & \text{if } t \in [a_i, b_i], \\ 0 & \text{otherwise.} \end{cases}$$

$$\text{Let } s''_i(t) = \begin{cases} \frac{1}{D} \max\{0, w_i^{\text{real}} - w_i^{\text{pred}}\} & \text{if } t \in [i, i + D], \\ 0 & \text{otherwise.} \end{cases}$$

$$\text{Let } s_i(t) = \frac{1}{\delta D} \int_{t-\delta D}^t s'_i(r) + s''_i(r) dr$$

**end on**

---

### 3.4 Other Extensions

In Appendix H we also consider General Speed Scheduling (the problem with general deadlines) and show that a more sophisticated method allows us to robustify any algorithm even in this more general setting. Hence, for this case we can also obtain an algorithm that is almost optimal in the consistency case and always robust.

The careful reader may have noted that one can craft instances so that the used error function  $\text{err}$  is very sensitive to small shifts in the prediction. An illustrative example is as follows. Consider a predicted workload  $w^{\text{pred}}$  defined by  $w_i^{\text{pred}} = 1$  for those time steps  $i$  that are divisible by a large constant, say 1000, and let  $w_i^{\text{pred}} = 0$  for all other time steps. If the real instance  $w^{\text{real}}$  is a small shift of  $w^{\text{pred}}$  say  $w_{i+1}^{\text{real}} = w_i^{\text{pred}}$  then the prediction error  $\text{err}(w^{\text{real}}, w^{\text{pred}})$  is large although  $w^{\text{pred}}$  intuitively forms a good prediction of  $w^{\text{real}}$ . To overcome this sensitivity, we first generalize the definition of  $\text{err}$  to  $\text{err}_\eta$  which is tolerant to small shifts in the workload. In particular,  $\text{err}_\eta(w^{\text{real}}, w^{\text{pred}}) = 0$  for the example given above. We then give a generic method for transforming an algorithm so as to obtain guarantees with respect to  $\text{err}_\eta$  instead of  $\text{err}$  at a small loss. Details can be found in Appendix F.

## 4 Experimental analysis

In this section, we will test the LAS algorithm on both synthetic and real datasets. We will calculate the competitive ratios with respect to the offline optimum. We fix  $\alpha = 3$  in all our experiments as this value models the power consumption of modern processors (see Bansal et al. [2]). For each experiment, we compare our LAS algorithm to the three main online algorithms that exist for this problem which are AVR and OA by Yao et al. [17] and BKP by Bansal et al. [2]. We note that the code is publicly available at <https://github.com/andreasr27/LAS>.

**Artificial datasets.** In the synthetic data case, we will mimic the request pattern of a typical data center application by simulating a bounded random walk. In the following we write  $Z \sim \mathcal{U}\{m, M\}$  when sampling an integer uniformly at random in the range  $[m, M]$ . Subsequently, we fix three integers  $s, m, M$  where  $[m, M]$  define the range in which the walk should stay. For each integral time  $i$  we sample  $X_i \sim \mathcal{U}\{-s, s\}$ . Then we set  $w_0 \sim \mathcal{U}\{m, M\}$  and  $w_{i+1}$  to be the median value of the list  $\{m, w_i + X_i, M\}$ , that is, if the value  $w_i + X_i$  remains in the predefined range we do not change it, otherwise we round it to the closest point in the range. For this type of ground truth instance we test our algorithm coupled with three different predictors. The **accurate** predictor for which we set  $\tilde{w}_i \sim w_i + \mathcal{U}\{-s, s\}$ , the **random** predictor where we set  $\tilde{w}_i \sim \mathcal{U}\{m, M\}$  and the **misleading** predictor for which  $\tilde{w}_i = (M - w_i) + m$ . In each case we perform 20 experiment runs. The results are summarized in Table 1. In the first two cases (accurate and random predictors) we present the average competitive ratios of every algorithm over all runs. In contrast, for the last column

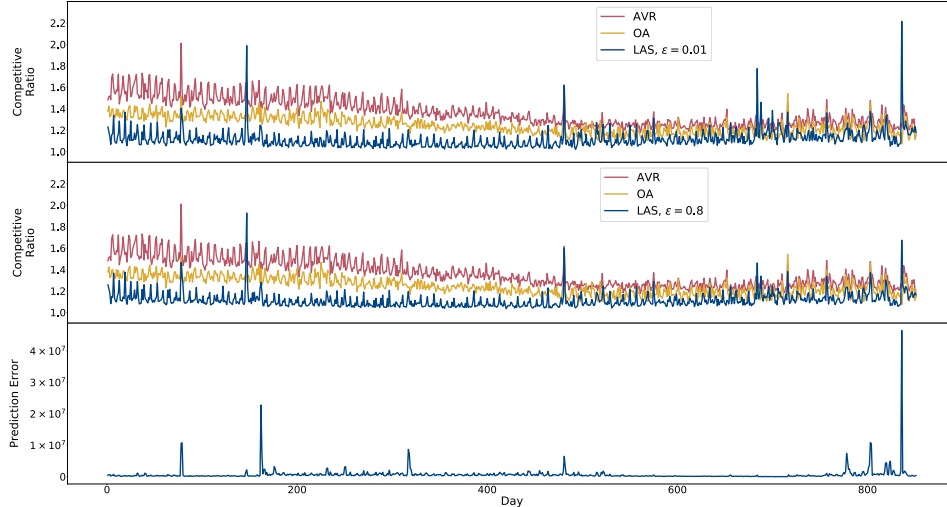

Figure 2: From top to bottom: The first two graphs show the performance of LAS when  $\varepsilon = 0.01$  and  $\varepsilon = 0.8$  with respect to the online algorithms AVR and OA. The bottom graph presents the prediction error. The timeline was discretized in chunks of ten minutes and  $D$  was set to 20.

Table 1: Artificial dataset results

| Algorithm                 | Accurate | Random | Misleading |
|---------------------------|----------|--------|------------|
| AVR                       | 1.268    | 1.268  | 1.383      |
| BKP                       | 7.880    | 7.880  | 10.380     |
| OA                        | 1.199    | 1.199  | 1.361      |
| LAS, $\varepsilon = 0.8$  | 1.026    | 1.203  | 1.750      |
| LAS, $\varepsilon = 0.6$  | 1.022    | 1.207  | 1.758      |
| LAS, $\varepsilon = 0.4$  | 1.018    | 1.213  | 1.767      |
| LAS, $\varepsilon = 0.2$  | 1.013    | 1.224  | 1.769      |
| LAS, $\varepsilon = 0.01$ | 1.008    | 1.239  | 1.766      |

We used  $m = 20$ ,  $M = 80$ ,  $s = 5$ ,  $T = 220$  and  $D = 20$ .

(misleading predictor) we present the maximum competitive ratio of each algorithm taken over the 20 runs to highlight the worst case robustness of LAS. We note that in the first case, where the predictor is relatively accurate but still noisy, LAS is consistently better than any online algorithm achieving a competitive ratio close to 1 for small values of  $\varepsilon$ . In the second case, the predictor does not give us useful information about the future since it is completely uncorrelated with the ground truth instance. In such a case, LAS experiences a similar performance to the best online algorithms. In the third case, the predictor tries to mislead our algorithm by creating a prediction which constitutes a symmetric (around  $(m + M)/2$ ) random walk with respect to the true instance. When coupled with such a predictor, as expected, LAS performs worse than the best online algorithm, but it still maintains an acceptable competitive ratio. Furthermore, augmenting the robustness parameter  $\varepsilon$ , and thereby trusting less the predictor, improves the competitive ratio in this case.

**Real dataset.** We provide additional evidence that the LAS algorithm outperforms purely online algorithms by conducting experiments on the login requests to *BrightKite* [5], a no longer functioning social network. We note that this dataset was previously used in the context of learning augmented algorithms by Lykouris and Vassilvitskii [13]. In order to emphasize the fact that even a very simple predictor can improve the scheduling performance drastically, we will use the arguably most simple predictor possible. We use the access patterns of the previous day as a prediction for the current day. In Figure 2 we compare the performance of the LAS algorithm for different values of the robustness parameter  $\varepsilon$  with respect to AVR and OA. We did not include BKP, since its performance is substantially worse than all other algorithms. Note that our algorithm shows a substantial improvement with respect to both AVR and OA, while maintaining a low competitive



ratio even when the prediction error is high (for instance in the last days). The first 100 days, where the prediction error is low, by setting  $\varepsilon = 0.01$  (and trusting more the prediction) we obtain an average competitive ratio of 1.134, while with  $\varepsilon = 0.8$  the average competitive ratio slightly deteriorates to 1.146. However, when the prediction error is high, setting  $\varepsilon = 0.8$  is better. On average from the first to the last day of the timeline, the competitive ratio of AVR and OA is 1.36 and 1.24 respectively, while LAS obtains an average competitive ratio of 1.116 when  $\varepsilon = 0.01$  and 1.113 when  $\varepsilon = 0.8$ , thus beating the online algorithms in both cases.

More experiments regarding the influence of the  $\alpha$  parameter in the performance of LAS algorithm can be found in Appendix I.

## Broader impact

As climate change is a severe issue, trying to minimize the environmental impact of modern computer systems has become a priority. High energy consumption and the CO<sub>2</sub> emissions related to it are some of the main factors increasing the environmental impact of computer systems. While our work considers a specific problem related to scheduling, we would like to emphasize that a considerable percentage of real-world systems already have the ability to dynamically scale their computing resources<sup>2</sup> to minimize their energy consumption. Thus, studying models (like the one presented in this paper) with the latter capability is a line of work with huge potential societal impact. In addition to that, although the analysis of the guarantees provided by our algorithm is not straightforward, the algorithm itself is relatively simple. The latter fact makes us optimistic that insights from this work can be used in practice contributing to minimizing the environmental impact of computer infrastructures.

## Acknowledgments and Disclosure of Funding

This research is supported by the Swiss National Science Foundation project 200021-184656 “Randomness in Problem Instances and Randomized Algorithms”. Andreas Maggiori was supported by the Swiss National Science Fund (SNSF) grant n° 200020\_182517/1 “Spatial Coupling of Graphical Models in Communications, Signal Processing, Computer Science and Statistical Physics”.

## References

- [1] Lachlan LH Andrew, Minghong Lin, and Adam Wierman. Optimality, fairness, and robustness in speed scaling designs. In *Proceedings of the ACM SIGMETRICS international conference on Measurement and modeling of computer systems*, pages 37–48, 2010.
- [2] Nikhil Bansal, Tracy Kimbrel, and Kirk Pruhs. Speed scaling to manage energy and temperature. *J. ACM*, 54(1):3:1–3:39, 2007. doi: 10.1145/1206035.1206038. URL <https://doi.org/10.1145/1206035.1206038>.
- [3] Nikhil Bansal, David P. Bunde, Ho-Leung Chan, and Kirk Pruhs. Average rate speed scaling. In *LATIN 2008: Theoretical Informatics, 8th Latin American Symposium, Búzios, Brazil, April 7-11, 2008, Proceedings*, pages 240–251, 2008. doi: 10.1007/978-3-540-78773-0\_21. URL [https://doi.org/10.1007/978-3-540-78773-0\\_21](https://doi.org/10.1007/978-3-540-78773-0_21).
- [4] Jeff Barr. New – predictive scaling for ec2, powered by machine learning. *AWS News Blog*, November 2018. URL <https://aws.amazon.com/blogs/aws/new-predictive-scaling-for-ec2-powered-by-machine-learning/>.
- [5] Eunjoon Cho, Seth A. Myers, and Jure Leskovec. Friendship and mobility: User movement in location-based social networks. In *Proceedings of the 17th ACM SIGKDD International Conference on Knowledge Discovery and Data Mining, KDD '11*, page 1082–1090, New York, NY, USA, 2011. Association for Computing Machinery. ISBN 9781450308137. doi: 10.1145/2020408.2020579. URL <https://doi.org/10.1145/2020408.2020579>.
- [6] Marco E. T. Gerards, Johann L. Hurink, and Philip K. F. Hölzenspies. A survey of offline algorithms for energy minimization under deadline constraints. *J. Scheduling*, 19(1):3–19, 2016.

---

<sup>2</sup>CPU Dynamic Voltage and Frequency Scaling (DVFS) in modern processors and autoscaling of cloud applications

- doi: 10.1007/s10951-015-0463-8. URL <https://doi.org/10.1007/s10951-015-0463-8>.
- [7] Sreenivas Gollapudi and Debmalya Panigrahi. Online algorithms for rent-or-buy with expert advice. In *Proceedings of the 36th International Conference on Machine Learning, ICML 2019, 9-15 June 2019, Long Beach, California, USA*, pages 2319–2327, 2019. URL <http://proceedings.mlr.press/v97/gollapudi19a.html>.
- [8] Chen-Yu Hsu, Piotr Indyk, Dina Katabi, and Ali Vakilian. Learning-based frequency estimation algorithms. In *7th International Conference on Learning Representations, ICLR 2019, New Orleans, LA, USA, May 6-9, 2019*, 2019. URL <https://openreview.net/forum?id=r1lohoCqY7>.
- [9] Craig Kitterman. Autoscaling windows azure applications. *Microsoft Azure Blog*, June 2013. URL <https://azure.microsoft.com/de-de/blog/autoscaling-windows-azure-applications/>.
- [10] Rohan Kodialam. Optimal algorithms for ski rental with soft machine-learned predictions. *CoRR*, abs/1903.00092, 2019. URL <http://arxiv.org/abs/1903.00092>.
- [11] Silvio Lattanzi, Thomas Lavastida, Benjamin Moseley, and Sergei Vassilvitskii. Online scheduling via learned weights. In *Proceedings of the 2020 ACM-SIAM Symposium on Discrete Algorithms, SODA 2020, Salt Lake City, UT, USA, January 5-8, 2020*, pages 1859–1877, 2020. doi: 10.1137/1.9781611975994.114. URL <https://doi.org/10.1137/1.9781611975994.114>.
- [12] Russell Lee, Mohammad H. Hajiesmaili, and Jian Li. Learning-assisted competitive algorithms for peak-aware energy scheduling. *CoRR*, abs/1911.07972, 2019. URL <http://arxiv.org/abs/1911.07972>.
- [13] Thodoris Lykouris and Sergei Vassilvitskii. Competitive caching with machine learned advice. In *Proceedings of the 35th International Conference on Machine Learning, ICML 2018, Stockholmsmässan, Stockholm, Sweden, July 10-15, 2018*, pages 3302–3311, 2018. URL <http://proceedings.mlr.press/v80/lykouris18a.html>.
- [14] Andres Muñoz Medina and Sergei Vassilvitskii. Revenue optimization with approximate bid predictions. In *Advances in Neural Information Processing Systems 30: Annual Conference on Neural Information Processing Systems 2017, 4-9 December 2017, Long Beach, CA, USA*, pages 1858–1866, 2017. URL <http://papers.nips.cc/paper/6782-revenue-optimization-with-approximate-bid-predictions>.
- [15] Manish Purohit, Zoya Svitkina, and Ravi Kumar. Improving online algorithms via ML predictions. In *Advances in Neural Information Processing Systems 31: Annual Conference on Neural Information Processing Systems 2018, NeurIPS 2018, 3-8 December 2018, Montréal, Canada*, pages 9684–9693, 2018. URL <http://papers.nips.cc/paper/8174-improving-online-algorithms-via-ml-predictions>.
- [16] Yinfeng Xu and Weijun Xu. Competitive algorithms for online leasing problem in probabilistic environments. In *Advances in Neural Networks - ISNN 2004, International Symposium on Neural Networks, Dalian, China, August 19-21, 2004, Proceedings, Part II*, pages 725–730, 2004. doi: 10.1007/978-3-540-28648-6\_116. URL [https://doi.org/10.1007/978-3-540-28648-6\\_116](https://doi.org/10.1007/978-3-540-28648-6_116).
- [17] F. Frances Yao, Alan J. Demers, and Scott Shenker. A scheduling model for reduced CPU energy. In *36th Annual Symposium on Foundations of Computer Science, Milwaukee, Wisconsin, USA, 23-25 October 1995*, pages 374–382, 1995. doi: 10.1109/SFCS.1995.492493. URL <https://doi.org/10.1109/SFCS.1995.492493>.

## A Omitted Proofs from Section 3

**Theorem 8.** For any given  $\varepsilon > 0$ , algorithm LAS constructs a schedule of cost at most  $\min \{(1 + \varepsilon) \text{OPT} + O\left(\frac{\alpha}{\varepsilon}\right)^\alpha \text{err}, O\left(\frac{\alpha}{\varepsilon}\right)^\alpha \text{OPT}\}$ .

*Proof.* We choose  $\delta$  such that  $\left(\frac{1+\delta}{1-\delta}\right)^\alpha = 1 + \varepsilon$ . Note that  $\delta \leq \varepsilon/(6\alpha)$ . By Claim 3 we know that

$$\text{OPT}(w^{\text{real}}, (1 - \delta)D, T) \leq \left(\frac{1}{1 - \delta}\right)^\alpha \text{OPT}.$$

Hence, by Theorem 2 algorithm LAS-TRUST constructs a schedule with cost at most

$$\left(\frac{1 + \delta}{1 - \delta}\right)^\alpha \text{OPT} + O\left(\frac{1}{\delta}\right)^\alpha \text{err}$$

Finally, we apply ROBUSTIFY and with Theorem 7 obtain a bound of

$$\begin{aligned} \min \left\{ \left(\frac{1 + \delta}{1 - \delta}\right)^\alpha \text{OPT} + O\left(\frac{1}{\delta}\right)^\alpha \text{err}, O\left(\frac{1}{\delta}\right)^\alpha \text{OPT} \right\} \\ \leq \min \left\{ (1 + \varepsilon) \text{OPT} + O\left(\frac{\alpha}{\varepsilon}\right)^\alpha \text{err}, O\left(\frac{\alpha}{\varepsilon}\right)^\alpha \text{OPT} \right\}. \quad \square \end{aligned}$$

## B Pure online algorithms for uniform deadlines

Since most related results concern the general speed scaling problem, we give some insights about the uniform speed scaling problem in the online setting without predictions. We first give a lower bound on the competitive ratio for any online algorithm for the simplest case where  $D = 2$  and then provide an almost tight analysis of the competitive ratio of AVR.

**Theorem 9.** There is no (randomized) online algorithm with an (expected) competitive ratio better than  $\Omega((6/5)^\alpha)$ .

*Proof.* Consider  $D = 2$  and two instances  $J_1$  and  $J_2$ . Instance  $J_1$  consists of only one job that is released at time 0 with workload 1 and  $J_2$  consists of the same first job with a second job which starts at time 1 with workload 2.

In both instances, the optimal schedule runs with uniform speed at all time. In the first instance, it runs the single job for 2 units of time at speed  $1/2$ . The energy-cost is therefore  $1/2^{\alpha-1}$ . In the second instance, it first runs the first job at speed 1 for one unit of time and then the second job at speed 1 for 2 units of time. Hence, it has an energy-cost of 3.

Now consider an online algorithm. Before time 1 both instances are identical and the algorithm therefore behaves the same. In particular, it has to decide how much work of job 1 to process between time 0 and 1. Let us fix some  $\gamma \geq 0$  as a threshold for the amount of work dedicated to job 1 by the algorithm before time 1. We have the following two cases depending on the instance.

1. If the algorithm processes more than  $\gamma$  units of work on job 1 before time 1 then for instance  $J_1$  the energy cost is at least  $\gamma^\alpha$ . Hence the competitive ratio is at least  $\gamma^\alpha \cdot 2^{\alpha-1}$ .
2. On the contrary, if the algorithm works less than  $\gamma$  units of work before the release of the second job then in instance  $J_2$  the algorithm has to complete at least  $3 - \gamma$  units of work between time 1 and 3. Hence, its competitive ratio is at least  $2/3 \cdot ((3 - \gamma)/2)^\alpha$ .

Choosing  $\gamma$  such that these two competitive ratios are equal gives  $\gamma = \frac{3}{3^{1/\alpha} 4^{1-1/\alpha} + 1}$  and yields a lower bound on the competitive ratio of at least:

$$2^{\alpha-1} \left( \frac{3}{3^{1/\alpha} 4^{1-1/\alpha} + 1} \right)^\alpha.$$

This term asymptotically approaches  $1/2 \cdot (6/5)^\alpha$  and this already proves the theorem for deterministic algorithms. More precisely, it proves that any deterministic algorithm has a competitive ratio of

at least  $\Omega((6/5)^\alpha)$  on at least one of the two instances  $J_1$  or  $J_2$ . Hence, by defining a probability distribution over inputs such that  $p(J_1) = p(J_2) = \frac{1}{2}$  and applying Yao's minimax principle we get that the expected competitive ratio of any randomized online algorithm is at least

$$(1/2) \cdot 2^{\alpha-1} \left( \frac{3}{3^{1/\alpha} 4^{1-1/\alpha} + 1} \right)^\alpha.$$

which again gives  $\Omega((6/5)^\alpha)$  as lower bound, this time against randomized algorithms.  $\square$

We now turn ourselves to the more specific case of the AVR algorithm with the following two results. We recall that the AVR algorithm was shown to be  $2^{\alpha-1} \cdot \alpha^\alpha$ -competitive by Yao et al. [17] in the general deadlines case. In the case of uniform deadlines, the competitive ratio of AVR is actually much better and proofs are much less technical than the original analysis of Yao et al. Recall that for each job  $i$  with workload  $w_i$ , release  $r_i$ , and deadline  $d_i$ ; AVR defines a speed  $s_i(t) = w_i/(d_i - r_i)$  if  $t \in [r_i, d_i]$  and 0 otherwise.

**Theorem 10.** *AVR is  $2^\alpha$ -competitive for the uniform speed scaling problem.*

*Proof.* Let  $(w, D, T)$  be a job instance and  $s_{\text{OPT}}$  be the speed function of the optimal schedule for this instance. Let  $s_{\text{AVR}}$  be the speed function produced by the AVERAGE RATE heuristic on the same instance. It suffices to show that for any time  $t$  we have

$$s_{\text{AVR}}(t) \leq 2 \cdot s_{\text{OPT}}(t).$$

Fix some  $t$ . We assume w.l.o.g. that the optimal schedule runs each job  $j$  isolated for a total time of  $p_j^*$ . By optimality of the schedule, the speed during this time is uniform, i.e., exactly  $w_j/p_j^*$ . Denote by  $j_t$  the job that is processed in the optimal schedule at time  $t$ .

Let  $j$  be some job with  $r_j \leq t \leq r_j + D$ . It must be that

$$\frac{w_j}{p_j^*} \leq \frac{w_{j_t}}{p_{j_t}^*} = s_{\text{OPT}}(t). \quad (2)$$

Note that all jobs  $j$  with  $r_j \leq t \leq r_j + D$  are processed completely between  $t - D$  and  $t + D$ . Therefore,

$$\sum_{J_j: r_j \leq t \leq r_j + D} p_j^* \leq 2D.$$

With (2) it follows that

$$\sum_{J_j: r_j \leq t \leq r_j + D} w_j \leq s_{\text{OPT}}(t) \sum_{J_j: r_j \leq t \leq r_j + D} p_j^* \leq 2D \cdot s_{\text{OPT}}(t).$$

We conclude that

$$s_{\text{AVR}}(t) = \sum_{J_j: r_j \leq t \leq r_j + D} \frac{w_j}{D} \leq 2 \cdot s_{\text{OPT}}(t). \quad \square$$

Next, we show that our upper bound on the exponential dependency in  $\alpha$  of the competitive ratio for AVR (in Theorem 10) is tight for the uniform deadlines case.

**Theorem 11.** *Asymptotically ( $\alpha$  approaches  $\infty$ ), the competitive ratio of the AVR algorithm for the uniform deadlines case is at least*

$$\frac{2^\alpha}{e\alpha}$$

*Proof.* Assume  $\alpha > 2$  and consider a two-job instance with one job arriving at time 0 of workload 1 and one job arriving at time  $(1 - 2/\alpha)D$  with workload 1. One can check that the optimal schedule runs at constant speed throughout the whole instance for a total energy of

$$\left( \frac{2}{(2 - 2/\alpha)D} \right)^\alpha \cdot (2 - 2/\alpha)D.$$

On the other hand, on interval  $[(1 - 2/\alpha)D, D]$ , AVR runs at speed  $2/D$ . This implies the following lower bound on the competitive ratio:

$$\frac{(2/D)^\alpha \cdot (2/\alpha)D}{\left(\frac{2}{(2-2/\alpha)D}\right)^\alpha \cdot (2 - 2/\alpha)D} = \frac{2^\alpha}{\alpha} \left(1 - \frac{1}{\alpha}\right)^{\alpha-1}$$

which approaches to  $2^\alpha/(e\alpha)$  as  $\alpha$  tends to infinity.  $\square$

## C Impossibility results for learning augmented speed scaling

This section is devoted to prove some impossibility results about learning augmented algorithms in the context of speed scaling. We first prove that our trade-offs between consistency and robustness are essentially optimal. Again, we describe an instance as a triple  $(w, D, T)$ .

**Theorem 12.** *Assume a deterministic learning enhanced algorithm is  $(1 + \varepsilon/3)^{\alpha-1}$ -consistent for any  $\alpha \geq 1$  and any small enough constant  $\varepsilon > 0$  (independently of  $D$ ). Then the worst case competitive ratio of this algorithm cannot be better than  $\Omega\left(\frac{1}{\varepsilon}\right)^{\alpha-1}$ .*

*Proof.* Fix  $D$  big enough so that  $\lceil \varepsilon D \rceil \leq 2 \cdot (\varepsilon D)$ . Consider two different job instances  $J_1$  and  $J_2$ :  $J_1$  contains only one job of workload 1 released at time 0 and  $J_2$  contains an additional job of workload  $1/\varepsilon$  released at time  $\lceil \varepsilon D \rceil$ . On the first instance, the optimal cost is  $1/D^{\alpha-1}$  while the optimum energy cost for  $J_2$  is  $(1/\lceil \varepsilon D \rceil)^{\alpha-1} + D/(\varepsilon D)^\alpha \leq (1/\varepsilon)^\alpha \cdot ((1 + \varepsilon)/D)^{\alpha-1}$ .

Assume the algorithm is given the job of workload 1 released at time 0 and additionally the prediction consists of one job of workload  $1/\varepsilon$  released at time  $\lceil \varepsilon D \rceil$ . Note that until time  $\lceil \varepsilon D \rceil$  the algorithm cannot tell the difference between instances  $J_1$  and  $J_2$ .

Depending on how much the algorithm works before time  $\lceil \varepsilon D \rceil$ , we distinguish the following cases.

1. If the algorithm works more than  $1/2$  then the energy spent by the algorithm until time  $\lceil \varepsilon D \rceil$  is at least

$$(1/2)^\alpha / (\lceil \varepsilon D \rceil)^{\alpha-1} = \Omega\left(\frac{1}{\varepsilon D}\right)^{\alpha-1}.$$

2. However, if it works less than  $1/2$  then on instance  $J_2$ , a total work of at least  $(1/\varepsilon + 1 - 1/2) = (1/2 + 1/\varepsilon)$  remains to be done in  $D$  time units. Hence the energy consumption on instance  $J_2$  is at least

$$\frac{(1/2 + 1/\varepsilon)^\alpha}{D^{\alpha-1}}.$$

If the algorithm is  $(1 + \varepsilon/3)^{\alpha-1}$ -consistent, then it must be that the algorithm works more than  $1/2$  before time  $\lceil \varepsilon D \rceil$  otherwise, by the second case of the analysis, the competitive ratio is at least

$$\frac{(1/2 + 1/\varepsilon)^\alpha}{(1/\varepsilon)^\alpha (1 + \varepsilon)} = \frac{(1 + \varepsilon/2)^\alpha}{1 + \varepsilon} > (1 + \varepsilon/3)^{\alpha-1},$$

where the last inequality holds for  $\alpha > 4$  and  $\varepsilon$  small enough.

However it means that if the algorithm was running on instance  $J_1$  (i.e. the prediction is incorrect) then by the first case the approximation ratio is at least  $\Omega\left(\frac{1}{\varepsilon}\right)^{\alpha-1}$ .  $\square$

We then argue that one cannot hope to rely on some  $l_p$  norm for  $p < \alpha$  to measure error.

**Theorem 13.** *Fix some  $\alpha$  and  $D$  and let  $p$  such that  $p < \alpha$ . Suppose there is an algorithm which on some prediction  $w^{\text{pred}}$  computes a solution of value at most*

$$C \cdot \text{OPT} + C' \cdot \|w - w^{\text{pred}}\|_p^p.$$

*Here  $C$  and  $C'$  are constants that can be chosen as an arbitrary function of  $\alpha$  and  $D$ .*

*Then it also exists an algorithm for the online problem (without predictions) which is  $(C + \varepsilon)$ -competitive for every  $\varepsilon > 0$ .*

In other words, predictions do not help, if we choose  $p < \alpha$ .

*Proof.* In the online algorithm we use the prediction-based algorithm  $A_P$  as a black box. We set the prediction  $\tilde{w}$  to all 0. We forward each job to  $A_P$ , but scale its work by a large factor  $M$ . It is obvious that by scaling the optimum of the instance increases exactly by a factor  $M^\alpha$ . The error in the prediction, however, increases less:

$$\|M \cdot w - M \cdot w^{\text{pred}}\|_p^p = M^p \cdot \|w - w^{\text{pred}}\|_p^p.$$

We run the jobs as  $A_P$  does, but scale them down by  $M$  again. Thus, we get a schedule of value

$$M^{-\alpha}(M^\alpha \cdot C \cdot \text{OPT} + M^p \cdot C' \cdot \|w - w^{\text{pred}}\|_p^p) = C \cdot \text{OPT} + M^{p-\alpha} \cdot C' \cdot \|w - w^{\text{pred}}\|_p^p. \quad (3)$$

Now if we choose  $M$  large enough, the second term in (3) becomes insignificant. First, we relate the prediction error to the optimum. First note that

$$\text{OPT} \geq (1/D^\alpha) \cdot \|w\|_\alpha^\alpha$$

since the optimum solution cannot be less expensive than running all jobs  $i$  disjointly at speed  $w_i/D$  for time  $D$ . Second note that  $\|w\|_p^p \leq \|w\|_\alpha^\alpha$  since  $|x|^p \leq |x|^\alpha$  for any  $x \geq 1$  (recall that we assumed our workloads to be integral). Hence we get that,

$$\|w - w^{\text{pred}}\|_p^p = \|w\|_p^p \leq D^\alpha \cdot \text{OPT}.$$

Choosing  $M$  sufficiently large gives  $M^{p-\alpha}C'D^\alpha < \varepsilon$ , which implies that (3) is at most  $(C + \varepsilon)\text{OPT}$ .  $\square$

## D Extension to evolving predictors

In this section, we extend the result of Section 3 to the case where the algorithm is provided several predictions over time. In particular, we assume that the algorithm is provided a new prediction at each integral time  $t$ . The setting is natural as for a very long timeline, it is intuitive that the predictor might renew its prediction over time. Since making a mistake in the prediction of a very far future seems also less hurtful than making a mistake in predicting an immediate future, we define a generalized error metric incorporating this idea.

Let  $0 < \lambda < 1$  be a parameter that describes how fast the confidence in a prediction deteriorates with the time until the expected arrival of the predicted job. Define the prediction received at time  $t$  as a workload vector  $w^{\text{pred}}(t)$ . Recall we are still considering the uniform deadlines case hence an instance is defined as a triplet  $(w, D, T)$ .

We then define the total error of a series of predictions as

$$\text{err}^{(\lambda)} = \sum_t \sum_{i=t+1}^{\infty} |w_i^{\text{real}} - w_i^{\text{pred}}(t)|^\alpha \cdot \lambda^{i-t}.$$

In the following we reduce the evolving predictions model to the single prediction one.

We would like to prove similar results as in the single prediction setting with respect to  $\text{err}^{(\lambda)}$ . In order to do so, we will split the instance into parts of bounded time horizon, solve each one independently with a single prediction, and show that this also gives a guarantee based on  $\text{err}^{(\lambda)}$ . In particular, we will use the algorithm for the single prediction model as a black box.

The basic idea is as follows. If no job were to arrive for a duration of  $D$ , then the instance before this interval and afterwards can be solved independently. This is because any job in the earlier instance must finish before any job in the later instance can start. Hence, they cannot interfere. At random points, we ignore all jobs for a duration of  $D$ , thereby split the instance. The ignored jobs will be scheduled sub-optimally using AVR. If we only do this occasionally, i.e., after every intervals of length  $\gg D$ , the error we introduce is negligible.

We proceed by defining the splitting procedure formally. Consider the timeline as infinite in both directions. To split the instance, we define some interval length  $2kD$ , where  $k \in \mathbb{N}$  will be specified later. We split the infinite timeline into contiguous intervals of length  $2kD$ . Moreover, we choose

an offset  $x \in \{0, \dots, k-1\}$  uniformly at random. Using these values, we define intervals  $I_i = [2((i-1)k-x)D, 2(ik-x)D)$ . We will denote by  $t_i = (2(i-1)k-x)D$  the start time of the interval  $I_i$ . Consequently, the end of  $I_i$  is  $t_{i+1}$ .

In each interval  $I_i$ , we solve the instance given by the jobs entirely contained in this interval using our algorithm with the most recent prediction as of time  $t_i$ , i.e.,  $w^{\text{pred}}(t_i)$ , and schedule the jobs accordingly. We write  $s^{\text{ALG}(i)}$  for this schedule. For the jobs that are overlapping with two contiguous intervals we schedule them independently using the AVERAGE RATE heuristic. The schedule for the jobs overlapping with intervals  $I_i$  and  $I_{i+1}$  will be referred to as  $s^{\text{AVR}(i)}$ .

It is easy to see that this algorithm is robust: The energy of the produced schedule is

$$\begin{aligned} \int \left( \sum_i \left[ s^{\text{ALG}(i)}(t) + s^{\text{AVR}(i)}(t) \right] \right)^\alpha dt \\ \leq 2^\alpha \int \left( \sum_i s^{\text{ALG}(i)}(t) \right)^\alpha dt + 2^\alpha \int \left( \sum_i s^{\text{AVR}(i)}(t) \right)^\alpha dt. \end{aligned}$$

Moreover, the first term can be bounded by  $2^\alpha \cdot O(\alpha/\varepsilon)^\alpha \text{OPT}$  using Theorem 8 and the second term can be bounded by  $2^\alpha \cdot 2^\alpha \text{OPT}$  because of Theorem 10. This gives an overall bound of  $O(\alpha/\varepsilon)^\alpha$  on the competitive ratio.

In the rest of the section we focus on the consistency/smoothness guarantee. We first bound the costs of  $s^{\text{ALG}(i)}$  and  $s^{\text{AVR}(i)}$  isolated (ignoring potential interferences). Using these bounds, we derive an overall guarantee for the algorithm's cost.

**Lemma 14.**

$$\mathbb{E} \left( \sum_i \int s^{\text{AVR}(i)}(t)^\alpha dt \right) \leq \frac{2^\alpha}{k} \text{OPT}$$

*Proof.* Fix some  $i > 0$  and let us call  $O_i$  the job instance consisting of jobs overlapping with both intervals  $I_i$  and  $I_{i+1}$ . By Theorem 10 the energy used by AVR is at most a  $2^\alpha$ -factor from the optimum schedule. Hence,

$$\int s^{\text{AVR}(i)}(t)^\alpha dt \leq 2^\alpha \text{OPT}(O_i).$$

Now denote by  $s^{\text{OPT}}$  the speed function of the optimum schedule over the whole instance. Then

$$\text{OPT}(O_i) \leq \int_{t_i-D}^{t_i+D} s^{\text{OPT}}(t)^\alpha dt.$$

This holds because  $s^{\text{OPT}}$  processes some work during  $[t_i - D, t_i + D]$  which has to include all of  $O_i$ . Hence, we have that

$$\begin{aligned} \mathbb{E} \left( \sum_i \text{OPT}(O_i) \right) \\ \leq \frac{1}{k} \sum_{x=0}^{k-1} \sum_i \int_{2(ik-x)D-D}^{2(ik-x)D+D} s^{\text{OPT}}(t)^\alpha dt \\ \leq \frac{1}{k} \int s^{\text{OPT}}(t)^\alpha dt = \frac{1}{k} \text{OPT} \end{aligned}$$

The second inequality holds, because the integrals are over disjoint ranges. Together, with the bound on  $s^{\text{AVR}(i)}$  we get the claimed inequality.  $\square$

**Lemma 15.**

$$\sum_i \int s^{\text{ALG}(i)}(t)^\alpha dt \leq (1 + \varepsilon) \text{OPT} + O\left(\frac{\alpha}{\varepsilon}\right)^\alpha \cdot \lambda^{-2kD} \cdot \text{err}(\lambda).$$

*Proof.* Note that for any  $i$

$$\sum_{t=(t_i)+1}^{t_{(i+1)}} |w_t^{\text{real}} - w_t^{\text{pred}}(t_i)|^\alpha \leq \lambda^{-2kD} \sum_{t=(t_i)+1}^{t_{(i+1)}} |w_t^{\text{real}} - w_t^{\text{pred}}(t_i)|^\alpha \lambda^{t-t_i}.$$

Hence,

$$\sum_i \sum_{t=t_i}^{t_{i+1}} |w_t^{\text{real}} - w_t^{\text{pred}}(t_i)|^\alpha \leq \lambda^{-2kD} \text{err}(\lambda).$$

Using Theorem 8 for each  $\int s_{\text{ALG}}^{(i)}(t)^\alpha dt$ , we get a bound depending on  $\sum_{t=t_i}^{t_{i+1}} |w_t^{\text{real}} - w_t^{\text{pred}}(t_i)|^\alpha$ . Summing over  $i$  and using the inequality above finishes the proof of the lemma.  $\square$

We are ready to state the consistency/smoothness guarantee of the splitting algorithm.

**Theorem 16.** *With robustness parameter  $O(\varepsilon/\alpha)$  the splitting algorithm produces in expectation a schedule of cost at most*

$$(1 + \varepsilon) \text{OPT} + O\left(\frac{\alpha}{\varepsilon}\right)^\alpha \cdot \lambda^{-D/\varepsilon \cdot O(\alpha/\varepsilon)^\alpha} \cdot \text{err}(\lambda).$$

In other words, we get the same guarantee as in the single prediction case, except that the dependency on the error is larger by a factor of  $\lambda^{-D/\varepsilon \cdot O(\alpha/\varepsilon)^\alpha}$ . The exponential dependency on  $D$  may seem unsatisfying, but (1) it cannot be avoided (see Theorem 17) and (2) for moderate values of  $\lambda$ , e.g.  $\lambda = 1 - 1/D$ , this exponential dependency vanishes.

*Proof.* We will make use of the following inequality: For all  $a, b \geq 0$  and  $0 < \delta \leq 1$ , it holds that

$$(a + b)^\alpha \leq (1 + \delta)a^\alpha + \left(\frac{3\alpha}{\delta}\right)^\alpha b^\alpha.$$

This follows from a simple case distinction whether  $b \leq a \cdot \delta/(2\alpha)$ . In expectation, the cost of the algorithm is bounded by

$$\begin{aligned} & \mathbb{E} \left[ \int \left( \sum_i [s^{\text{ALG}(i)}(t) + s^{\text{AVR}(i)}(t)] \right)^\alpha dt \right] \\ & \leq (1 + \varepsilon) \mathbb{E} \left[ \int \sum_i (s^{\text{ALG}(i)}(t))^\alpha dt \right] \\ & \quad + \left(\frac{3\alpha}{\varepsilon}\right)^\alpha \mathbb{E} \left[ \int \sum_i (s^{\text{AVR}(i)}(t))^\alpha dt \right] \\ & \leq (1 + \varepsilon) \int \sum_i s^{\text{ALG}(i)}(t)^\alpha dt \\ & \quad + \frac{1}{k} \left(\frac{6\alpha}{\varepsilon}\right)^\alpha \text{OPT}. \end{aligned}$$

By choosing  $k = 1/\varepsilon(6\alpha/\varepsilon)^\alpha$  the latter term becomes  $\varepsilon \text{OPT}$ . With Lemma 15 we can bound the term above by

$$(1 + \varepsilon)^3 \text{OPT} + O\left(\frac{\alpha}{\varepsilon}\right)^\alpha \cdot \lambda^{-D/\varepsilon \cdot O(\alpha/\varepsilon)^\alpha} \cdot \text{err}(\lambda).$$

Scaling  $\varepsilon$  by a constant yields the claimed guarantee.  $\square$

We complement the result of this section with an impossibility result. We allow the parameter  $\lambda$  in the definition of  $\text{err}(\lambda)$  to be a function of  $D$  and we write  $\lambda(D)$ .

**Theorem 17.** *Let  $\text{err}(\lambda)$  the error in the evolving prediction model be defined with some  $0 < \lambda(D) < 1$  that can depend on  $D$ . Suppose there is an algorithm which computes a solution of value at most*

$$C \cdot \text{OPT} + C'(D) \cdot \text{err}(\lambda),$$

where  $C$  is independent of  $D$  and  $C'(D) = o\left(\frac{1-\lambda(D)^D}{\lambda(D)^D} \cdot \frac{1}{D^\alpha}\right)$ . Then there also exists an algorithm for the online problem (without predictions) which is  $(C + \varepsilon)$ -competitive for every  $\varepsilon > 0$ .



In particular, note that for  $\lambda$  independent of  $D$ , it shows that an exponential dependency in  $D$  is needed in  $C'(D)$  as we get in Theorem 16.

*Proof.* The structure of the proof is similar to that of Theorem 13. We pass an instance to the assumed algorithm, but set the prediction to all 0. Unlike the previous proof, we keep the same workloads when passing the jobs, but subdivide  $D$  in to  $D \cdot k$  time steps where  $k$  will be specified later. This will decrease the cost of every solution by  $k^\alpha$ .

Take an instance with interval length  $D$ . Like in the proof of Theorem 13 we have that

$$\|w^{\text{real}}\|_\alpha^\alpha \leq D^\alpha \cdot \text{OPT}.$$

Consider the error parameter  $\text{err}^{(\lambda)'}$  for the instance with  $D' = D \cdot k$ . We observe that

$$\begin{aligned} \text{err}^{(\lambda)'} &= \sum_t \sum_{i=t+1}^{\infty} |w_{k \cdot i}^{\text{real}}|^\alpha \cdot \lambda(D')^{k(i-t)} \\ &\leq \|w^{\text{real}}\|_\alpha^\alpha \cdot \sum_{i=1}^{\infty} \lambda(D')^{k \cdot i} \\ &\leq \|w^{\text{real}}\|_\alpha^\alpha \frac{\lambda(D')^k}{1 - \lambda(D')^k} \\ &\leq D^\alpha \frac{\lambda(D')^k}{1 - \lambda(D')^k} \cdot \text{OPT} \end{aligned}$$

Hence, by definition the algorithm produces a solution of cost

$$C \cdot \text{OPT} / k^\alpha + C'(D') \text{err}^{(\lambda)'} \leq (C/k^\alpha + D^\alpha \frac{\lambda(D')^k}{1 - \lambda(D')^k} C'(D')) \cdot \text{OPT}$$

for the subdivided instance. Transferring it to the original instance, we get a cost of

$$(C + k^\alpha D^\alpha \frac{\lambda(D')^k}{1 - \lambda(D')^k} C'(D')) \cdot \text{OPT}$$

Therefore, if  $k^\alpha \frac{\lambda(D \cdot k)^k}{1 - \lambda(D \cdot k)^k} C'(D \cdot k)$  tends to 0 as  $k$  grows, for any  $\varepsilon > 0$ , we can fix  $k$  big enough so that the cost of the algorithm is at most  $(C + \varepsilon) \text{OPT}$ .  $\square$

## E A shrinking lemma

Recall that by applying the earliest-deadline-first policy, we can normalize every schedule to run at most one job at each time. We say, it is run *isolated*. Moreover, if a job is run isolated, it is always better to run it at a uniform speed (by convexity of  $x \mapsto x^\alpha$  on  $x \geq 0$ ). Hence, an optimal schedule can be characterized solely by the total time  $p_j$  each job is run. Given such  $p_j$  we will give a necessary and sufficient condition of when a schedule that runs each job isolated for  $p_j$  time exists. Note that we assume we are in the general deadline case, each job  $j$  comes with a release  $r_j$  and deadline  $d_j$  and the EDF policy might cause some jobs to be preempted.

**Lemma 18.** *Let there be a set of  $n$  jobs with release times  $r_j$  and deadlines  $d_j$  for each job  $j$ . Let  $p_j$  denote the total duration that  $j$  should be processed. Scheduling the jobs isolated earliest-deadline-first, with the constraint to never run a job before its release time, will complete every job  $j$  before time  $d_j$  if and only if for every interval  $[t, t']$  it holds that*

$$\sum_{j: t \leq r_j, d_j \leq t'} p_j \leq t' - t \tag{4}$$

*Proof.* For the one direction, let  $t, t'$  such that (4) is not fulfilled. Since the jobs with  $t \leq r_j$  cannot be processed before  $t$ , the last such job  $j'$  to be completed must finish after

$$t + \sum_{j: t \leq r_j, d_j \leq t'} p_j > t + t' - t = t' \geq d_{j'}$$

For the other direction, we will schedule the jobs earliest-deadline-first and argue that if the schedule completes some job after its deadline, then (4) is not satisfied for some interval  $[t, t']$ .

To this end, let  $j'$  be the first job that finishes strictly after  $d_{j'}$  and consider the interval  $I_0 = [r_{j'}, d_{j'}]$ . We now define the following operator that transforms our interval  $I_0$  into an interval  $I_1$ . Consider  $t_{\text{inf}}$  to be the smallest release time among all jobs that are processed in interval  $I_0$  and define  $I_1 = [t_{\text{inf}}, d_{j'}]$ . We apply iteratively this operation to obtain interval  $I_{k+1}$  from interval  $I_k$ . We claim the following properties that we prove by induction.

1. For any  $k \geq 0$ , the machine is never idle in interval  $I_k$ .
2. For any  $k \geq 0$ , all jobs that are processed in  $I_k$  have a deadline  $\leq d_{j'}$ .

For  $I_0 = [r_{j'}, d_{j'}]$ , since job  $j'$  is not finished by time  $d_{j'}$  it must be that the machine is never idle in that interval. Additionally, if a job is processed in this interval, it must be that its deadline is earlier than  $d_{j'}$  since we process in EDF order. Assume both items hold for  $I_k$  and then consider  $I_{k+1}$  that we denote by  $[a_{k+1}, d_{j'}]$ . By construction, there is a job denoted  $j_{k+1}$  released at time  $a_{k+1}$  that is not finished by time  $a_k$ . Therefore the machine cannot be idle at any time in  $[a_{k+1}, a_k]$  hence at any time in  $I_{k+1}$  by the induction hypothesis. Furthermore, consider a job processed in  $I_{k+1} \setminus I_k$ . It must be that its deadline is earlier than the deadline of job  $j_{k+1}$ . But job  $j_{k+1}$  is processed in interval  $I_k$  which implies that its deadline is earlier than  $d_{j'}$  and ends the induction.

Denote by  $k'$  the first index such that  $I_{k'} = I_{k'+1}$ . We define  $I_\infty = I_{k'}$ . By construction, it must be that all jobs processed in  $I_\infty$  have release time in  $I_\infty$  and by induction the machine is never idle in this interval and all jobs processed in  $I_\infty$  have deadline in  $I_\infty$ .

Since job  $j'$  is not finished by time  $d_{j'}$  and by the previous remarks we have that

$$\sum_{j:r_j, d_j \in I_\infty} p_j > |I_\infty|$$

which yields a counter example to (4).  $\square$

We can now prove two shrinking lemmas that are needed in the procedure ROBUSTIFY and its generalization to general deadlines.

**Lemma 19.** *Let  $0 \leq \mu < 1$ . For any instance  $\mathcal{I}$  consider the instance  $\mathcal{I}'$  where the deadline of job  $j$  is set to  $d'_j = r_j + (1 - \mu)(d_j - r_j)$  (i.e. we shrink each job by a  $(1 - \mu)$  factor). Then*

$$\text{OPT}(\mathcal{I}') \leq \frac{\text{OPT}(\mathcal{I})}{(1 - \mu)^{\alpha-1}}$$

*Additionally, assuming  $0 \leq \mu < 1/2$ , consider the instance  $\mathcal{I}''$  where the deadline of job  $j$  is set to  $d''_j = r_j + (1 - \mu)(d_j - r_j)$  and the release time is set to  $r''_j = r_j + \mu(d_j - r_j)$ . Then*

$$\text{OPT}(\mathcal{I}'') \leq \frac{\text{OPT}(\mathcal{I})}{(1 - 2\mu)^{\alpha-1}}$$

*Proof.* W.l.o.g. we can assume that the optimal schedule  $s$  for  $\mathcal{I}$  runs each job isolated and at a uniform speed. By optimality of the schedule and convexity, each job  $j$  must be run at a constant speed  $s_j$  for a total duration of  $p_j$ . Consider the first case and define a speed  $s'_j = \frac{s_j}{1-\mu}$  for all  $j$  (hence the total processing time becomes  $p'_j = (1 - \mu) \cdot p_j$ ).

Assume now in the new instance  $\mathcal{I}'$  we run jobs earliest-deadline-first with the constraint that no job is run before its release time (with the processing times  $p'_j$ ). We will prove using Lemma 18 that all deadlines are satisfied. Consider now an interval  $[t, t']$  we then have that

$$\sum_{j:t \leq r_j, d'_j \leq t'} p'_j = (1 - \mu) \cdot \sum_{j:t \leq r_j, d_j \leq t'} p_j \leq (1 - \mu) \cdot \sum_{j:t \leq r_j, d_j \leq \frac{t' - \mu t}{1 - \mu}} p_j$$

where the last inequality comes from the fact that  $t' \geq d'_j = d_j - \mu(d_j - r_j)$  which implies that  $d_j \leq \frac{t' - \mu r_j}{1 - \mu} \leq \frac{t' - \mu t}{1 - \mu}$  by using  $r_j \geq t$ . By Lemma 18 and the fact that  $s$  is a feasible schedule for  $\mathcal{I}$

we have that

$$\sum_{j:t \leq r_j, d'_j \leq t'} p'_j \leq (1 - \mu) \cdot \left( \frac{t' - \mu t}{1 - \mu} - t \right) = (1 - \mu) \cdot \frac{t' - t}{1 - \mu} = t' - t$$

which implies by Lemma 18 that running all jobs EDF with processing time  $p'_j$  satisfies all deadlines  $d'_j$ . Now notice the cost of this schedule is at most  $\frac{1}{(1-\mu)^{\alpha-1}}$  times the original schedule  $s$  which ends the proof (each job is ran  $\frac{1}{1-\mu}$  times faster but for a time  $(1 - \mu)$  times shorter).

The proof of the second case is similar. Note that for any  $[t, t']$ , if

$$\begin{aligned} d''_j &= r_j + (1 - \mu)(d_j - r_j) = (1 - \mu)d_j + \mu r_j \leq t' \\ r''_j &= r_j + \mu(d_j - r_j) = (1 - \mu)r_j + \mu d_j \geq t \end{aligned}$$

then we have

$$\begin{aligned} (1 - \mu)d_j &\leq t' - \mu r_j \leq t' - \frac{\mu}{1 - \mu} (t - \mu d_j) \\ \iff (1 - \mu)d_j - \frac{\mu^2}{1 - \mu} d_j &\leq t' - \frac{\mu}{1 - \mu} \cdot t \\ \iff d_j((1 - \mu)^2 - \mu^2) &\leq (1 - \mu)t' - \mu t \\ \iff d_j &\leq \frac{(1 - \mu)t' - \mu t}{1 - 2\mu} \end{aligned}$$

Similarly, we have

$$\begin{aligned} (1 - \mu)r_j &\geq t - \mu d_j \geq t - \frac{\mu}{1 - \mu} (t' - \mu r_j) \\ \iff (1 - \mu)r_j - \frac{\mu^2}{1 - \mu} r_j &\geq t - \frac{\mu}{1 - \mu} \cdot t' \\ \iff r_j &\geq \frac{(1 - \mu)t - \mu t'}{1 - 2\mu} \end{aligned}$$

Notice that  $\frac{(1-\mu)t' - \mu t}{1 - 2\mu} - \frac{(1-\mu)t - \mu t'}{1 - 2\mu} = \frac{t' - t}{1 - 2\mu}$

Therefore, if we set the speed that each job  $s''_j$  is processed to  $s''_j = \frac{s_j}{1 - 2\mu}$  then we have a processing time  $p''_j = (1 - 2\mu) \cdot p_j$  and we can write

$$\begin{aligned} \sum_{j:t \leq r''_j, d''_j \leq t'} p''_j &= (1 - 2\mu) \cdot \sum_{j:t \leq r''_j, d''_j \leq t'} p_j \\ &\leq (1 - 2\mu) \cdot \sum_{j: \frac{(1-\mu)t - \mu t'}{1 - 2\mu} \leq r_j, d_j \leq \frac{(1-\mu)t' - \mu t}{1 - 2\mu}} p_j \\ &\leq (1 - 2\mu) \cdot \frac{t' - t}{1 - 2\mu} = t' - t \end{aligned}$$

by Lemma 18. Hence we can conclude similarly as in the previous case.  $\square$

## F Making an algorithm noise tolerant

The idea for achieving noise tolerance is that by Lemma 19 we know that if we delay each job's arrival slightly (e.g., by  $\eta D$ ) we can still obtain a near optimal solution. This gives us time to reassign arriving jobs within a small interval in order to make the input more similar to the prediction. We first, in Section F.1, generalize the error function  $\text{err}$  to a more noise tolerant error function  $\text{err}_\eta$ . We then, in Section F.2, give a general procedure for making an algorithm noise tolerant (see Theorem 20).

## F.1 Noise tolerant measure of error

For motivation, recall the example given in the main body. Specifically, consider a predicted workload  $w^{\text{pred}}$  defined by  $w_i^{\text{pred}} = 1$  for those time steps  $i$  that are divisible by a large constant, say 1000, and let  $w_i^{\text{pred}} = 0$  for all other time steps. If the real instance  $w^{\text{real}}$  is a small shift of  $w^{\text{pred}}$  say  $w_{i+1}^{\text{real}} = w_i^{\text{pred}}$  then the prediction error  $\text{err}(w^{\text{real}}, w^{\text{pred}})$  is large although  $w^{\text{pred}}$  intuitively forms a good prediction of  $w^{\text{real}}$ . To overcome this sensitivity to noise, we generalize the definition of  $\text{err}$ .

For two workload vectors  $w, w'$ , and a parameter  $\eta \geq 0$ , we say that  $w$  is in the  $\eta$ -neighborhood of  $w'$ , denoted by  $w \in N_\eta(w')$ , if  $w$  can be obtained from  $w'$  by moving the workload at most  $\eta D$  time steps forward or backward in time. Formally  $w \in N_\eta(w')$  if there exists a solution  $\{x_{ij}\}$  to the following system of linear equations<sup>3</sup>:

$$\begin{aligned} w_i &= \sum_{j=i-\eta D}^{i+\eta D} x_{ij} & \forall i \\ w'_j &= \sum_{i=j-\eta D}^{j+\eta D} x_{ij} & \forall j \end{aligned}$$

The concept of  $\eta$ -neighborhood is inspired by the notion of earth mover's distance but is adapted to our setting. Intuitively, the variable  $x_{ij}$  denotes how much of the load  $w_i$  has been moved to time unit  $j$  in order to obtain  $w'$ . Also note that it is a symmetric and reflexive relation, i.e., if  $w \in N_\eta(w')$  then  $w' \in N_\eta(w)$  and  $w \in N_\eta(w)$ .

We now generalize the measure of prediction error as follows. For a parameter  $\eta \geq 0$ , an instance  $w^{\text{real}}$ , and a prediction  $w^{\text{pred}}$ , we define the  $\eta$ -prediction error, denoted by  $\text{err}_\eta$ , as

$$\text{err}_\eta(w^{\text{real}}, w^{\text{pred}}) = \min_{w \in N_\eta(w^{\text{pred}})} \text{err}(w^{\text{real}}, w).$$

Note that by symmetry we have that  $\text{err}_\eta(w^{\text{real}}, w^{\text{pred}}) = \text{err}_\eta(w^{\text{pred}}, w^{\text{real}})$ . Furthermore, we have that  $\text{err}_\eta = \text{err}$  if  $\eta = 0$  but it may be much smaller for  $\eta > 0$ . To see this, consider the vectors  $w^{\text{pred}}$  and  $w_i^{\text{real}} = w_{i+1}^{\text{pred}}$  given in the motivational example above. While  $\text{err}(w^{\text{pred}}, w^{\text{real}})$  is large, we have  $\text{err}_\eta(w^{\text{pred}}, w^{\text{real}}) = 0$  for any  $\eta$  with  $\eta D \geq 1$ . Indeed the definition of  $\text{err}_\eta$  is exactly so as to allow for a certain amount of noise (calibrated by the parameter  $\eta$ ) in the prediction.

## F.2 Noise tolerant procedure

We give a general procedure for making an algorithm  $\mathcal{A}$  noise tolerant under the mild condition that  $\mathcal{A}$  is monotone: we say that an algorithm is monotone if given a predictor  $w^{\text{pred}}$  and duration  $D$ , the cost of scheduling a workload  $w$  is at least as large as that of scheduling a workload  $w'$  if  $w \geq w'$  (coordinate-wise). That increasing the workload should only increase the cost of a schedule is a natural condition that in particular all our algorithms satisfy.

**Theorem 20.** *Suppose there is a monotone learning-augmented online algorithm  $\mathcal{A}$  for the uniform speed scaling problem, that given prediction  $w^{\text{pred}}$ , computes a schedule of an instance  $w^{\text{real}}$  of value at most*

$$\min\{C \cdot \text{OPT} + C' \text{err}(w^{\text{real}}, w^{\text{pred}}), C'' \text{OPT}\}.$$

*Then, for every  $\eta \geq 0$ ,  $\zeta > 0$  there is a learning-augmented online algorithm  $\text{NOISE-ROBUST}(\mathcal{A})$ , that given prediction  $w^{\text{pred}}$ , computes a schedule of  $w^{\text{real}}$  of value at most  $((1 + \eta)(1 + \zeta))^{O(\alpha)}$  times*

$$\min\{C \cdot \text{OPT} + (1/\zeta)^{O(\alpha)}(C + C') \text{err}_\eta(w^{\text{real}}, w^{\text{pred}}), C'' \text{OPT}\}.$$

The pseudo-code of the online algorithm  $\text{NOISE-ROBUST}(\mathcal{A})$ , obtained from  $\mathcal{A}$ , is given in Algorithm 2.

<sup>3</sup>To simplify notation, we assume that  $\eta D$  evaluates to an integer and we have extended the vectors  $w$  and  $w'$  to take value 0 outside the range  $[0, T - D]$ .

---

**Algorithm 2** NOISE-ROBUST( $\mathcal{A}$ )

---

**Input:** Algorithm  $\mathcal{A}$ , prediction  $w^{\text{pred}}$ , and  $\eta \geq 0, \zeta > 0$

- 1: Initialize  $\mathcal{A}$  with prediction  $\bar{w}_i^{\text{pred}} = (1 + \zeta)w_{i-\eta D}^{\text{pred}}$  and duration  $(1 - 2\eta)D$
- 2: Let  $w^{\text{online}}$  and  $\bar{w}^{\text{real}}$  be workload vectors, initialized to 0
- 3: **on time step**  $i$  **do**
- 4:    $W \leftarrow w_i^{\text{real}}$
- 5:   **for**  $j \in \{i - \eta D, \dots, i + \eta D\}$  **do**
- 6:     **if**  $w_j^{\text{online}} + W \leq (1 + \zeta)w_j^{\text{pred}}$  **then**
- 7:        $x_{ij} \leftarrow W$
- 8:        $W \leftarrow 0$
- 9:        $w_j^{\text{online}} \leftarrow w_j^{\text{online}} + W$
- 10:     **else if**  $w_j^{\text{online}} < (1 + \zeta)w_j^{\text{pred}}$  **then**
- 11:        $x_{ij} \leftarrow (1 + \zeta)w_j^{\text{pred}} - w_j^{\text{online}}$
- 12:        $W \leftarrow W - x_{ij}$
- 13:        $w_j^{\text{online}} \leftarrow (1 + \zeta)w_j^{\text{pred}}$
- 14:     **end if**
- 15:   **end for**
- 16:   // Distribute remaining workload  $W$  evenly
- 17:   **for**  $j \in \{i - \eta D, \dots, i + \eta D\}$  **do**
- 18:      $x_{ij} \leftarrow x_{ij} + W/(2\eta D + 1)$
- 19:      $w_j^{\text{online}} \leftarrow w_j^{\text{online}} + W/(2\eta D + 1)$
- 20:   **end for**
- 21:    $\bar{w}_i^{\text{real}} \leftarrow w_{i-\eta D}^{\text{online}}$
- 22:   Feed the job with workload  $\bar{w}_i^{\text{real}}$  to  $\mathcal{A}$
- 23: **end on**

---

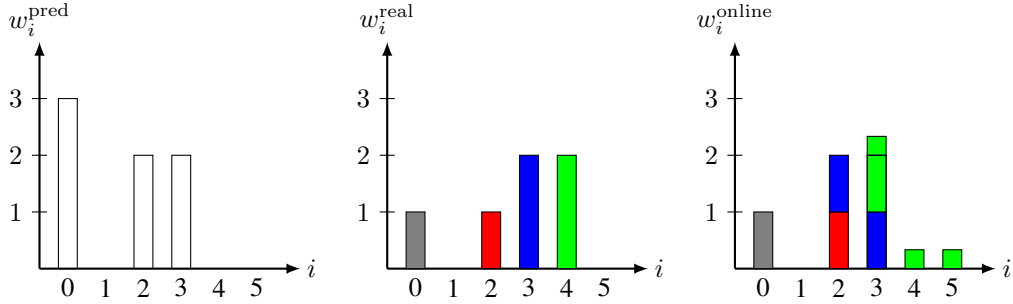

Figure 3: An example of the construction of the vector  $w^{\text{online}}$  from  $w^{\text{real}}$  and  $w^{\text{pred}}$ .

The algorithm constructs a vector  $w^{\text{online}} \in N_\eta(w^{\text{real}})$  while trying to minimize  $\text{err}(w^{\text{online}}, w^{\text{pred}})$ . Each component  $w_i^{\text{online}}$  will be finalized at time  $i + \eta D$ . Hence, we forward the jobs to  $\mathcal{A}$  with a delay of  $\eta D$ .

The vector is constructed as follows. Suppose a job  $w_i^{\text{real}}$  arrives. The algorithm first (see Steps 4-15) greedily assigns the workload to the time steps  $j = i - \eta D, i - \eta D + 1, \dots, i + \eta D$  from left-to-right subject to the constraint that no time step receives a workload higher than  $(1 + \zeta)w_j^{\text{pred}}$ . If not all workload of  $w_i^{\text{real}}$  was assigned in this way, then the overflow is assigned uniformly to the time steps from  $i - \eta D$  to  $i + \eta D$  (Steps 17-20). Since each  $w_j^{\text{online}}$  can only receive workloads during time steps  $j - \eta D, \dots, j + \eta D$ , it will be finalized at time  $j + \eta D$ . Thus, at time  $i$  we can safely forward  $w_{i-\eta D}^{\text{online}}$  to the algorithm  $\mathcal{A}$ . Hence, we set the workload of the algorithm's instance to  $\bar{w}_i^{\text{real}} = w_{i-\eta D}^{\text{online}}$  (Steps 21-22). This shift together with the fact that a job  $w_i^{\text{real}}$  may be assigned to  $w_{i+\eta D}^{\text{online}}$ , i.e.,  $\eta D$  time steps forward in time, is the reason why we run each job with an interval of length  $(1 - 2\eta)D$ . Shrinking the interval of each job allows to make this shift and reassignment while still guaranteeing that each job is finished by its original deadline.

For an example, consider Figure 3. Here we assume that  $\eta D = 1$  and for illustrative purposes that  $\zeta = 0$ . At time 0, a workload  $w_0^{\text{real}} = 1$  is released. The algorithm  $\text{NOISE-ROBUST}(\mathcal{A})$  then greedily constructs  $w^{\text{online}}$  by filling the available slots in  $w_{-1}^{\text{pred}}$ ,  $w_0^{\text{pred}}$ , and  $w_1^{\text{pred}}$ . Since  $w_0^{\text{pred}} = 3$ , it fits all of the workload of  $w_0^{\text{real}}$  at time 0. Similarly the workloads  $w_2^{\text{real}}$  and  $w_3^{\text{real}}$  both fit under the capacity given by  $w^{\text{pred}}$ . Now consider the workload  $w_4^{\text{real}} = 2$  released at time 4. At this point, the available workload at time 2 is fully occupied and one there is one unit of workload left at time 3. Hence,  $\text{NOISE-ROBUST}(\mathcal{A})$  will first assign the one unit of  $w_4^{\text{real}}$  to the third time slot and then split the remaining unit of workload unit uniformly across the time steps 3, 4, 5. The obtained vector  $w^{\text{online}}$  is depicted on the right of Figure 3. The workload  $w^{\text{online}}$  is then fed online to the algorithm  $\mathcal{A}$  (giving a schedule of  $w^{\text{online}}$  and thus of  $w^{\text{real}}$ ) so that at time  $i$ ,  $\mathcal{A}$  receives the job  $\bar{w}_i^{\text{real}} = w_{i+\eta D}^{\text{online}} = w_{i+1}^{\text{online}}$  with a deadline of  $i + (1 - 2\eta)D = i + D - 2$ . This deadline is chosen so as to guarantee that a job is finished by  $\mathcal{A}$  within its original deadline. Indeed, by this selection, the last part of the job  $w_4^{\text{real}}$  that was assigned to  $w_5^{\text{online}}$  is guaranteed to finish by time  $6 + D - 2 = 4 + D$  which is its original deadline.

Having described the algorithm, we proceed to analyze its guarantees which will prove Theorem 20.

**Analysis.** We start by analyzing the noise tolerance of  $\text{NOISE-ROBUST}(\mathcal{A})$ .

**Lemma 21.** *The schedule computed by  $\text{NOISE-ROBUST}(\mathcal{A})$  has cost at most  $(1 + O(\eta))^\alpha C'' \text{OPT}$ .*

*Proof.* Let  $\text{OPT}$  and  $\text{OPT}'$  denote the cost of an optimum schedule of the original instance  $w^{\text{real}}$  with duration  $D$  and the instance  $\bar{w}^{\text{real}}$  with duration  $(1 - 2\eta)D$  fed to  $\mathcal{A}$ , respectively. The lemma then follows by showing that

$$\text{OPT}' \leq (1 + O(\eta))^\alpha \text{OPT} .$$

To show this inequality, consider an optimal schedule  $s$  of  $w^{\text{real}}$  subject to the constraint that every job  $w_i^{\text{real}}$  is scheduled within the time interval  $[i + 2\eta D, i + (1 - 2\eta)D]$ . By Lemma 19, we have that the cost of this schedule is at most  $(1 + O(\eta))^\alpha \text{OPT}$ . The statement therefore follows by arguing that  $s$  also gives a feasible schedule of  $\bar{w}^{\text{real}}$  with duration  $(1 - 2\eta)D$ . To see this note that  $\text{NOISE-ROBUST}(\mathcal{A})$  moves the workload  $w_i^{\text{real}}$  to a subset of  $\bar{w}_i^{\text{real}}, \bar{w}_{i+1}^{\text{real}}, \dots, \bar{w}_{i+2\eta D}^{\text{real}}$ . All of these jobs are allowed to be processed during  $[i + 2\eta D, i + (1 - 2\eta)D]$ . It follows that the part of these jobs that corresponds to  $w_i^{\text{real}}$  can be processed in the computed schedule  $s$  (whenever it processes  $w_i^{\text{real}}$ ) since  $s$  process that job in the time interval  $[i + 2\eta D, i + (1 - 2\eta)D]$ . By doing this “reverse-mapping” for every job, we can thus use  $s$  as a schedule for the instance  $\bar{w}^{\text{real}}$  with duration  $(1 - 2\eta)D$ .  $\square$

We now proceed to analyze the consistency and smoothness. The following lemma is the main technical part of the analysis. We use the common notation  $(a)^+$  for  $\max\{a, 0\}$ .

**Lemma 22.** *The workload vector  $w^{\text{online}}$  produced by  $\text{NOISE-ROBUST}(\mathcal{A})$  satisfies*

$$\sum_i \left[ \left( w_i^{\text{online}} - (1 + \zeta)w_i^{\text{pred}} \right)^+ \right]^\alpha \leq O(1/\zeta)^{3\alpha} \cdot \min_{w \in \mathcal{N}_\eta(w^{\text{real}})} \sum_i \left[ \left( w_i - w_i^{\text{pred}} \right)^+ \right]^\alpha .$$

The more technical proof of this lemma is given in Section F.2.1. Here, we explain how it implies the consistency and smoothness bounds of Theorem 20. For a workload vector  $w$ , we use the notation  $\text{OPT}(w)$  and  $\text{OPT}'(w)$  to denote the cost of an optimal schedule of workload  $w$  with duration  $D$  and  $(1 - 2\eta)D$ , respectively. Now let  $\hat{w}^{\text{online}}$  be the workload vector defined by

$$\hat{w}_i^{\text{online}} = \max\{w_i^{\text{online}}, (1 + \zeta)w_i^{\text{pred}}\} .$$

We analyze the cost of the schedule produced by  $\mathcal{A}$  for  $\hat{w}^{\text{online}}$  (shifted by  $\eta D$ ). This also bounds the cost of running  $\mathcal{A}$  with  $\bar{w}^{\text{real}}$ : Since  $\mathcal{A}$  is monotone, the cost of the schedule computed for the workload  $\hat{w}^{\text{online}}$  (shifted by  $\eta D$ ) can only be greater than that computed for  $\bar{w}^{\text{real}}$  which equals  $w^{\text{online}}$  (shifted by  $\eta D$ ). Furthermore, we have by Lemma 22 that

$$\begin{aligned} \text{err}(\hat{w}^{\text{online}}, (1 + \zeta)w^{\text{pred}}) &= \sum_i \left[ \left( w_i^{\text{online}} - (1 + \zeta)w_i^{\text{pred}} \right)^+ \right]^\alpha \\ &\leq O(1/\zeta)^{3\alpha} \text{err}_\eta(w^{\text{real}}, w^{\text{pred}}) . \end{aligned} \tag{5}$$

It follows by the assumptions on  $\mathcal{A}$  that the schedule computed by NOISE-ROBUST( $\mathcal{A}$ ) has cost at most

$$\begin{aligned} C \cdot \text{OPT}'(\hat{w}^{\text{online}}) + C' \cdot \text{err}(\hat{w}^{\text{online}}, (1 + \zeta)w^{\text{pred}}) \\ \leq C \cdot \text{OPT}'(\hat{w}^{\text{online}}) + O(1/\zeta)^{3\alpha} \cdot C' \cdot \text{err}_\eta(w^{\text{real}}, w^{\text{pred}}). \end{aligned}$$

The following lemma implies the consistency and smoothness, as stated in Theorem 20, by relating  $\text{OPT}'(\hat{w}^{\text{online}})$  with the cost  $\text{OPT} = \text{OPT}(w^{\text{real}})$ .

**Lemma 23.** *We have*

$$\text{OPT}'(\hat{w}^{\text{online}}) \leq ((1 + \eta)(1 + \zeta))^{O(\alpha)} (\text{OPT}(w^{\text{real}}) + O(1/\zeta)^{4\alpha} \text{err}_\eta(w^{\text{real}}, w^{\text{pred}})).$$

*Proof.* By the exact same arguments as in the proof of Theorem 2, we have that for any  $\eta' > 0$

$$\begin{aligned} \text{OPT}'(\hat{w}^{\text{online}}) &\leq (1 + \eta')^\alpha \text{OPT}'((1 + \zeta)w^{\text{pred}}) + O(1/\eta')^\alpha \text{err}(\hat{w}^{\text{online}}, (1 + \zeta)w^{\text{pred}}) \\ &\leq (1 + \eta')^\alpha \text{OPT}'((1 + \zeta)w^{\text{pred}}) + O(1/\eta')^\alpha O(1/\zeta)^{3\alpha} \text{err}_\eta(w^{\text{real}}, w^{\text{pred}}), \end{aligned}$$

where we used (5) for the second inequality.

By Lemma 19, we have that decreasing the duration by a factor  $(1 - 2\eta)$  only increases the cost by factor  $(1 + O(\eta))^\alpha$  and so  $\text{OPT}'((1 + \zeta)w^{\text{pred}}) \leq (1 + O(\eta))^\alpha \text{OPT}((1 + \zeta)w^{\text{pred}})$ . Furthermore, as a schedule for a workload  $w^{\text{pred}}$  gives a schedule for  $(1 + \zeta)w^{\text{pred}}$  by increasing the speed by a factor  $(1 + \zeta)$ , we get

$$\text{OPT}'((1 + \zeta)w^{\text{pred}}) \leq (1 + O(\eta))^\alpha (1 + \zeta)^\alpha \text{OPT}(w^{\text{pred}}).$$

Hence, by choosing  $\eta' = \zeta$ ,

$$\text{OPT}'(\hat{w}^{\text{online}}) \leq (1 + O(\eta))^\alpha (1 + \zeta)^{2\alpha} \text{OPT}(w^{\text{pred}}) + O(1/\zeta)^{4\alpha} \text{err}_\eta(w^{\text{real}}, w^{\text{pred}}).$$

It remains to upper bound  $\text{OPT}(w^{\text{pred}})$  by  $\text{OPT}(w^{\text{real}})$ . Let  $w = \text{argmin}_{w \in N_\eta(w^{\text{pred}})} \text{err}(w, w^{\text{real}})$  and so  $\text{err}_\eta(w^{\text{real}}, w^{\text{pred}}) = \text{err}(w^{\text{real}}, w)$ . By again applying the arguments of Theorem 2, we have for any  $\eta' > 0$

$$\text{OPT}(w) \leq (1 + \eta')^\alpha \text{OPT}(w^{\text{real}}) + O(1/\eta')^\alpha \text{err}(w^{\text{real}}, w).$$

Now consider an optimal schedule of  $w$  subject to that for every time  $t$  the job  $w_t$  is scheduled within the interval  $[t + \eta D, t + (1 - \eta)D]$ . By Lemma 19, we have that this schedule has cost at most  $(1 + O(\eta))^\alpha \text{OPT}(w)$ . Observe that this schedule for  $w$  also defines a feasible schedule for  $w^{\text{pred}}$  since the time of any job is shifted by at most  $\eta D$  in  $w$ . Hence, by again selecting  $\eta' = \zeta$ ,

$$\begin{aligned} \text{OPT}(w^{\text{pred}}) &\leq (1 + O(\eta))^\alpha \text{OPT}(w) \\ &\leq (1 + O(\eta))^\alpha ((1 + \zeta)^\alpha \text{OPT}(w^{\text{real}}) + O(1/\zeta)^\alpha \text{err}_\eta(w^{\text{real}}, w^{\text{pred}})) \end{aligned}$$

Finally, by combining all inequalities, we get

$$\text{OPT}'(\hat{w}^{\text{online}}) \leq (1 + O(\eta))^{2\alpha} ((1 + \zeta)^{3\alpha} \text{OPT}(w^{\text{real}}) + O(1/\zeta)^{4\alpha} \text{err}_\eta(w^{\text{real}}, w^{\text{pred}}))$$

□

### F.2.1 Proof of Lemma 22

The lemma is trivially true if there were no jobs that had remaining workloads to be assigned uniformly, i.e., if we always have  $\bar{W} = 0$  at Step 16 of NOISE-ROBUST( $\mathcal{A}$ ). So suppose that there was at least one such job and consider the directed bipartite graph  $G$  with bipartitions  $A$  and  $B$  defined as follows:

- $A$  contains a vertex for each component of  $w^{\text{real}}$  and  $B$  contains one for each component of  $w^{\text{online}}$ . In other words,  $A$  and  $B$  contain one vertex for each time unit.
- There is an arc from  $i \in A$  to  $j \in B$  if  $|i - j| \leq \eta D$ , that is, if  $w_i^{\text{real}}$  could potentially be assigned to  $w_j^{\text{online}}$ .

- There is an arc from  $j \in B$  to  $i \in A$  if part of the workload of  $w_i^{\text{real}}$  was assigned to  $w_j^{\text{online}}$  by NOISE-ROBUST( $\mathcal{A}$ ), i.e., if  $x_{ij} > 0$ .

Now let  $t$  be the *last* time step such that the online algorithm had to assign the remaining workload of  $w_t^{\text{real}}$  uniformly. So, by selection,  $t + \eta D$  is the last time step so that  $w_{t+\eta D}^{\text{online}} > (1 + \zeta)w_{t+\eta D}^{\text{pred}}$ . For  $k \geq 0$ , define the sets

$$\begin{aligned} A_k &= \{i \in A : \text{the shortest path from } t \text{ to } i \text{ has length } 2k \text{ in } G\}, \\ B_k &= \{j \in B : \text{the shortest path from } t \text{ to } j \text{ has length } 2k + 1 \text{ in } G\}. \end{aligned}$$

Here  $t$  stands for the corresponding vertex in  $A$ . The set  $A_k$  consists of those time steps, for which the corresponding jobs in  $w^{\text{real}}$  have been moved in  $w^{\text{online}}$  to the time slots in  $B_{k-1}$  but not to any time slot in  $B_{k-2}, B_{k-3}, \dots, B_0$ ; and  $B_k$  are all the time slots where the jobs corresponding to  $A_k$  could have been assigned (but no job in  $A_{k-1}, A_{k-2}, \dots, A_0$  could have been assigned). By the selection of  $t$ , and the construction of  $w^{\text{online}}$ , these sets satisfy the following two properties:

**Claim 24.** *The sets  $(A_k, B_k)_{k \geq 0}$  satisfy*

- For any time step  $j \in \bigcup_k B_k$  we have  $w_j^{\text{online}} \geq (1 + \zeta)w_j^{\text{pred}}$ .
- For any two time steps  $i_k \in A_k$  and  $i_\ell \in A_\ell$  with  $k > \ell$ , we have  $i_k - i_\ell \leq 2\eta D(k - \ell + 2)$ .

*Proof of claim.* In the proof of the claim we use the notation  $\ell(A_k)$  and  $\ell(B_k)$  to denote the left-most (earliest) time step in  $A_k$  and  $B_k$ , respectively. The proof is by induction on  $k \geq 0$  with the following induction hypothesis (IH):

1. For any time step  $j \in B_k$  we have  $w_j^{\text{online}} \geq (1 + \zeta)w_j^{\text{pred}}$ .
2.  $B_0 = \{t - \eta D, \dots, t + \eta D\}$  and for any (non-empty)  $B_k$  with  $k > 1$  we have  $B_k = \{\ell(B_k), \dots, \ell(B_{k-1}) - 1\}$  and  $\ell(B_k) - \ell(B_{k-1}) \leq 2\eta D$ .

The first part of IH immediately implies the first part of the claim. The second part implies the second part of the claim as follows: Any time step in  $A_\ell$  has a time step in  $B_\ell$  that differs by at most  $\eta D$ . Similarly, for any time step in  $A_k$  there is a time step in  $B_{k-1}$  at distance at most  $\eta D$ . Now by the second part of the induction hypothesis, the distance between these time steps in  $B_{k-1}$  and  $B_\ell$  is at most  $(k - \ell + 1)2\eta D$ .

We complete the proof by verifying the inductive hypothesis. For the base case when  $k = 0$ , we have  $B_0 = \{t - \eta D, \dots, t + \eta D\}$  by definition since  $A_0 = \{t\}$ . We also have that the first part of IH holds by the definition of NOISE-ROBUST( $\mathcal{A}$ ) and the fact that the overflow of job  $w^{\text{real}}(t)$  was uniformly assigned to these time steps.

For the inductive step, consider a time step  $i \in A_k$ . By definition  $w_i^{\text{real}}$  was assigned to a time step in  $B_{k-1}$  but to no time step in  $B_{k-2} \cup \dots \cup B_0$ . Now suppose toward contradiction that there is a time step  $j \in A_{k-1}$  such that  $j < i$ . But then by the greedy strategy of NOISE-ROBUST( $\mathcal{A}$ ) (jobs are assigned left-to-right), we reach the contradiction that  $w_i^{\text{real}}$  must have been assigned to a time step in  $B_{k-2} \cup \dots \cup B_0$  if  $k \geq 2$  since then  $w_j^{\text{real}}$  is assigned to a time step in  $B_{k-2}$ . For  $k = 1$ , we have  $j = t$  and so all time steps in  $B_0$  were full (with respect to capacity  $(1 + \zeta)w^{\text{pred}}$ ) after  $t$  was processed. Hence, in this case,  $w_i^{\text{real}}$  could only be assigned to a time step in  $B_0$  if it had overflow that was uniformly assigned by NOISE-ROBUST( $\mathcal{A}$ ), which contradicts the selection of  $t$ .

We thus have that each time step in  $A_k$  is smaller than the earliest time step in  $A_{k-1}$ . It follows that  $B_k = \{\ell(B_k), \dots, \ell(B_{k-1}) - 1\}$  where  $\ell(B_k) = \ell(A_k) - \eta D$ . The bound  $\ell(B_k) - \ell(B_{k-1}) \leq 2\eta D$  then follows since, by definition,  $\{\ell(A_k) - \eta D, \dots, \ell(A_k) + \eta D\}$  must intersect  $B_{k-1}$ . This completes the inductive step for the second part of IH. For the first part, note that the job  $w_{\ell(A_k)}^{\text{real}}$  was also assigned to  $B_{k-1}$  by NOISE-ROBUST( $\mathcal{A}$ ). By the greedy left-to-right strategy, this only happens if the capacity of all time steps  $B_k$  is saturated.  $\square$



Now let  $p$  be the smallest index such that  $w^{\text{real}}(A_{p+1}) + w^{\text{real}}(A_{p+2}) \leq \zeta' \sum_{i=0}^p w^{\text{real}}(A_i)$  where we select  $\zeta' = \zeta/10$ . We have

$$\sum_{i=0}^{p+1} w^{\text{real}}(A_i) \geq \sum_{i=0}^p w^{\text{online}}(B_i) \geq (1 + \zeta) \sum_{i=0}^p w^{\text{pred}}(B_i) \quad (6)$$

where the first inequality holds by the definition of the sets and the second is by the first part of the above claim. In addition, by the selection of  $p$ ,

$$\sum_{i=0}^p w^{\text{real}}(A_i) \geq (1 - \zeta') \sum_{i=0}^{p+2} w^{\text{real}}(A_i). \quad (7)$$

Now let  $q = \max\{p - 4/(\zeta')^2, 0\}$ . We claim the following inequality

$$\sum_{i=q}^p w^{\text{real}}(A_i) \geq (1 - \zeta') \sum_{i=0}^p w^{\text{real}}(A_i). \quad (8)$$

The inequality is trivially true if  $q = 0$ . Otherwise, we have by the selection of  $p$ ,

$$\begin{aligned} \sum_{i=q}^p w^{\text{real}}(A_i) &= (1 - \zeta') \sum_{i=q}^p w^{\text{real}}(A_i) + \zeta' \sum_{i=q}^p w^{\text{real}}(A_i) \\ &\geq (1 - \zeta') \sum_{i=q}^p w^{\text{real}}(A_i) + \frac{(p-q)}{2} (\zeta')^2 \sum_{i=0}^{q-1} w^{\text{real}}(A_i) \\ &\geq (1 - \zeta') \sum_{i=q}^p w^{\text{real}}(A_i) + 2 \sum_{i=0}^{q-1} w^{\text{real}}(A_i) \end{aligned}$$

and so (8) holds.

We are now ready to complete the proof of the lemma. Let  $w^*$  be a minimizer of the right-hand-side, i.e.,

$$w^* = \operatorname{argmin}_{w \in N_\eta(w^{\text{real}})} \sum_i \left[ (w_i - w_i^{\text{pred}})^+ \right]^\alpha$$

Divide the time steps of the instance into  $T_1$ ,  $B_{p+1}$ ,  $T_2$  and  $T_3$  where  $T_1$  contains all time steps earlier than  $\ell(B_{p+1})$ ,  $T_2$  contains the time steps in  $\cup_{i=0}^p B_i$ , and  $T_3$  contains the remaining time steps, i.e., those after  $t + \eta D$ . By the selection of  $t$ , we have  $w_i^{\text{online}} \leq (1 + \zeta) w_i^{\text{pred}}$  for all  $i \in T_3$ . We thus have that  $\sum_i \left[ (w_i^{\text{online}} - (1 + \zeta) w_i^{\text{pred}})^+ \right]^\alpha$  equals

$$\sum_{i \in T_1} \left[ (w_i^{\text{online}} - (1 + \zeta) w_i^{\text{pred}})^+ \right]^\alpha + \sum_{i \in B_{p+1} \cup T_2} \left[ (w_i^{\text{online}} - (1 + \zeta) w_i^{\text{pred}})^+ \right]^\alpha.$$

We start by analyzing the second sum. The only jobs in  $w^{\text{real}}$  that contribute to the workload of  $w^{\text{online}}$  at the time steps in  $B_{p+1} \cup T_2$  are by definition those corresponding to time steps in  $A_0 \cup \dots \cup A_{p+2}$ . In the worst case, we have that  $w^{\text{pred}}$  is 0 during these time steps and that the jobs in  $w^{\text{real}}$  are uniformly assigned to the same  $2\eta D + 1$  time steps. This gives us the upper bound:

$$\begin{aligned} \sum_{i \in B_{p+1} \cup T_2} \left[ (w_i^{\text{online}} - (1 + \zeta) w_i^{\text{pred}})^+ \right]^\alpha &\leq \left( \frac{\sum_{i=0}^{p+2} w^{\text{real}}(A_i)}{2\eta D + 1} \right)^\alpha \cdot (2\eta D + 1) \\ &\leq (1 + \zeta')^\alpha \left( \frac{\sum_{i=0}^p w^{\text{real}}(A_i)}{2\eta D} \right)^\alpha 2\eta D. \end{aligned}$$

At the same time, combining (6) (7), and (8) give us

$$\sum_{i=q}^p w^{\text{real}}(A_i) \geq (1 - \zeta')^2 (1 + \zeta) \sum_{i=0}^p w^{\text{pred}}(B_i) \geq (1 + \zeta/2) \sum_{i=0}^p w^{\text{pred}}(B_i).$$

By definition, the jobs in  $w^{\text{real}}$  corresponding to time steps  $\cup_{k=q}^p A_k$  can only be assigned to  $w^{\text{online}}$  during time steps  $T_2 = \cup_{k=0}^p B_k$ . Therefore, as the difference between the largest time and smallest time in  $\cup_{k=q}^p A_k$  is at most  $2\eta D(p - q + 2)$  (second statement of the above claim) and thus the workload of those time steps can be assigned to at most  $2\eta D(p - q + 4)$  time steps, we have

$$\begin{aligned} \sum_{i \in T_2} \left[ \left( w_i^* - w_i^{\text{pred}} \right)^+ \right]^\alpha &\geq \left( \frac{\sum_{i=q}^p w^{\text{real}}(A_i) - \sum_{i=0}^p w^{\text{pred}}(B_i)}{(p - q + 4) \cdot 2\eta D} \right)^\alpha \cdot (p - q + 4) \cdot 2\eta D \\ &\geq (c \cdot \zeta^3)^\alpha \left( \frac{\sum_{i=0}^p w^{\text{real}}(A_i)}{2\eta D} \right)^\alpha \cdot 2\eta D \end{aligned}$$

for an absolute constant  $c$ . It follows that

$$\sum_{i \in B_{p+1} \cup T_2} \left[ \left( w_i^{\text{online}} - (1 + \zeta) w_i^{\text{pred}} \right)^+ \right]^\alpha \leq \left( \frac{1 + \zeta'}{c \zeta^3} \right)^\alpha \sum_{i \in T_2} \left[ \left( w_i^* - w_i^{\text{pred}} \right)^+ \right]^\alpha.$$

We have thus upper bounded the sum on the left over time steps in  $B_{p+1} \cup T_2$  by the sum on the right over only time steps in  $T_2$ . Since NOISE-ROBUST( $\mathcal{A}$ ) does not assign the workload  $w_i^{\text{real}}$  for  $i \in T_1$  to  $w^{\text{online}}$  on any of the time steps in  $T_2$ , we can repeatedly apply the arguments on the time steps in  $T_1$  to show

$$\sum_{i \in T_1} \left[ \left( w_i^{\text{online}} - (1 + \zeta) w_i^{\text{pred}} \right)^+ \right]^\alpha \leq \left( \frac{1 + \zeta'}{c \zeta^3} \right)^\alpha \sum_{i \in T_1 \cup B_{p+1}} \left[ \left( w_i^* - w_i^{\text{pred}} \right)^+ \right]^\alpha,$$

yielding the statement of the lemma.

## G ROBUSTIFY for uniform deadlines

Here we provide the proofs of Claim 4, Claim 5, Claim 6.

**Claim 4.** *If  $s$  is a feasible schedule for  $(w^{\text{real}}, (1 - \delta)D, T)$  then  $s^{(\delta)}$  is a feasible schedule for  $(w^{\text{real}}, D, T)$ .*

*Proof.* Since  $s$  is a feasible schedule for  $(w, (1 - \delta)D, T)$ , we have that

$$\int_{r_i}^{r_i+D} s_i^{(\delta)}(t) dt = \int_{r_i}^{r_i+D} \frac{1}{\delta D} \left( \int_{t-\delta D}^t s_i(t') dt' \right) dt = \int_{r_i}^{r_i+(1-\delta)D} s_i(t') \left( \int_{t'}^{t'+\delta D} \frac{1}{\delta D} dt \right) dt' = w_i.$$

□

**Claim 5.** *The cost of schedule  $s^{(\delta)}$  is not higher than that of  $s$ , that is,*

$$\int_0^T (s^{(\delta)}(t))^\alpha dt \leq \int_0^T (s(t))^\alpha dt.$$

*Proof.* The proof only uses Jensen's inequality in the second line and the statement can be calculated as follows.

$$\begin{aligned} \int_0^T (s^{(\delta)}(t))^\alpha dt &= \int_0^T \left( \frac{1}{\delta D} \int_{t-\delta D}^t s(t') dt' \right)^\alpha dt \\ &\leq \int_0^T \frac{1}{\delta D} \left( \int_{t-\delta D}^t (s(t'))^\alpha dt' \right) dt \\ &= \int_0^T (s(t'))^\alpha \left( \int_{t'}^{t'+\delta D} \frac{1}{\delta D} dt \right) dt' \\ &= \int_0^T (s(t))^\alpha dt \end{aligned}$$

□

**Claim 6.** Let  $s$  be a feasible schedule for  $(w^{\text{real}}, (1 - \delta)D, T)$ . Then  $s_i^{(\delta)}(t) \leq \frac{1}{\delta} s_i^{\text{AVR}}(t)$ .

*Proof.* We have that

$$s_i^{(\delta)}(t) = \frac{1}{\delta D} \int_{t-\delta D}^t s_i(t') dt' \leq \frac{1}{\delta D} \int_{r_i}^{r_i+D} s_i(t') dt' = \frac{w_i}{\delta D} = \frac{s_i^{\text{AVR}}(t)}{\delta}.$$

□

## H ROBUSTIFY for general deadlines

In this section, we discuss generalizations of our techniques to general deadlines. Recall that an instance with general deadlines is defined by a set  $\mathcal{J}$  of jobs  $J_j = (r_j, d_j, w_j)$ , where  $r_j$  is the time the job becomes available,  $d_j$  is the deadline by which it must be completed, and  $w_j$  is the work to be completed. For  $\delta > 0$ , we use the notation  $\mathcal{J}^\delta$  to denote the instance obtained from  $\mathcal{J}$  by shrinking the duration of each job by a factor  $(1 - \delta)$ . That is, for each job  $(r_j, d_j, w_j) \in \mathcal{J}$ ,  $\mathcal{J}^\delta$  contains the job  $(r_j, r_j + (1 - \delta)(d_j - r_j), w_j)$ .

Our main result in this section generalizes ROBUSTIFY to general deadlines.

**Theorem 25.** For any  $\delta > 0$ , given an online algorithm for general deadlines that produces a schedule for  $\mathcal{J}^\delta$  of cost  $C$ , we can compute online a schedule for  $\mathcal{J}$  of cost at most

$$\min \left\{ \left( \frac{1}{1 - \delta} \right)^{\alpha - 1} C, (2\alpha/\delta^2)^\alpha / 2 \cdot \text{OPT} \right\},$$

where OPT denotes the cost of an optimal schedule of  $\mathcal{J}$ .

Since it is easy to design a consistent algorithm by just blindly following the prediction, we have the following corollary.

**Corollary 26.** There exists a learning augmented online algorithm for the General Speed Scaling problem, parameterized by  $\varepsilon > 0$ , with the following guarantees:

- **Consistency:** If the prediction is accurate, then the cost of the returned schedule is at most  $(1 + \varepsilon) \text{OPT}$ .
- **Robustness:** Irrespective of the prediction, the cost of the returned schedule is at most  $O(\alpha^3/\varepsilon^2)^\alpha \cdot \text{OPT}$ .

*Proof of Corollary.* Consider the algorithm that blindly follows the prediction to do an optimal schedule of  $\mathcal{J}^\delta$  when in the consistent case. That is, given the prediction of  $\mathcal{J}$ , it schedules all jobs that agrees with the prediction according to the optimal schedule of the predicted  $\mathcal{J}^\delta$ ; the workload of the remaining jobs  $j$  that were wrongly predicted is scheduled uniformly during their duration from release time  $r_j$  to deadline  $d_j$ . In the consistent case, when the prediction is accurate, the cost of the computed schedule equals thus the cost  $\text{OPT}(\mathcal{J}^\delta)$  of an optimal schedule of  $\mathcal{J}^\delta$ . Furthermore, we have by Lemma 19

$$\text{OPT}(\mathcal{J}^\delta) \leq \left( \frac{1}{1 - \delta} \right)^{\alpha - 1} \text{OPT},$$

where OPT denotes the cost of an optimal schedule to  $\mathcal{J}$ . Applying Theorem 25 on this algorithm we thus obtain an algorithm that is also robust. Specifically, we obtain an algorithm with the following guarantees:

- If prediction is accurate, then the computed schedule has cost at most  $\left( \frac{1}{1 - \delta} \right)^{2(\alpha - 1)} \cdot \text{OPT}$ .
- The cost of the computed schedule is always at most  $(2\alpha/\delta^2)^\alpha / 2 \cdot \text{OPT}$ .

The corollary thus follows by selecting  $\delta = \Theta(\varepsilon/\alpha)$  so that  $1/(1 - \delta)^{2(\alpha - 1)} = 1 + \varepsilon$ .

□

We remark that one can also define “smooth” algorithms for general deadlines as we did in the uniform case. However, the prediction model and the measure of error quickly get complex and notation heavy. Indeed, our main motivation for studying the Uniform Speed Scaling problem is that it is a clean but still relevant version that allows for a natural prediction model.

We proceed by proving the main theorem of this section, Theorem 25.

**The procedure GENERAL-ROBUSTIFY.** We describe the procedure GENERAL-ROBUSTIFY that generalizes ROBUSTIFY to general deadlines. Its analysis then implies Theorem 25. Let  $\mathcal{A}$  denote the online algorithm of Theorem 25 that produces a schedule of  $\mathcal{J}^\delta$  of cost  $C$ . To simplify the description of GENERAL-ROBUSTIFY, we fix  $\Delta > 0$  and assume that the schedule  $s$  output by  $\mathcal{A}$  only changes at times that are multiples of  $\Delta$ . This is without loss of generality as we can let  $\Delta$  tend to 0. To simplify our calculations, we further assume that  $\delta(d_j - r_j)/\Delta$  evaluates to an integer for all jobs  $(r_j, d_j, w_j) \in \mathcal{J}$ .

The time line is thus partitioned into time intervals of length  $\Delta$  so that in each time interval either no job is processed by  $s$  or exactly one job is processed at constant speed by  $s$ . We denote by  $s(t)$  the speed at which  $s$  processes the job  $j(t)$  during the  $t$ :th time interval, where we let  $s(t) = 0$  and  $j(t) = \perp$  if no job was processed by  $s$  (during this time interval).

To describe the schedule computed by GENERAL-ROBUSTIFY, we further divide each time interval into a *base* part of length  $(1 - \delta)\Delta$  and an *auxiliary* part of length  $\delta\Delta$ . In the  $t$ :th time interval, GENERAL-ROBUSTIFY schedules job  $j(t)$  at a certain speed  $s^{\text{base}}(t)$  during the base part, and a subset  $\mathcal{J}(t) \subseteq \mathcal{J}$  of the jobs is scheduled during the auxiliary part, each  $i \in \mathcal{J}(t)$  at a speed  $s_i^{\text{aux}}(t)$ . These quantities are computed by GENERAL-ROBUSTIFY online at the start of the  $t$ :th time interval as follows:

- Let  $s^{\text{aux}}(t) = \sum_{i \in \mathcal{J}(t)} s_i^{\text{aux}}(t)$  be the current speed of the auxiliary part and let  $D_{j(t)} = d_{j(t)} - r_{j(t)}$  be the duration of job  $j(t)$ .
- If  $s(t)/(1 - \delta) \leq s^{\text{aux}}(t)$ , then set  $s^{\text{base}}(t) = s(t)/(1 - \delta)$ .
- Otherwise, set  $s^{\text{base}}(t)$  so that

$$(1 - \delta)\Delta s^{\text{base}}(t) + (s^{\text{base}}(t) - s^{\text{aux}}(t)) \delta^2 D_{j(t)} = s(t)\Delta \quad (9)$$

and add  $j(t)$  to  $J(t), J(t + 1), \dots, J(t + \delta D_{j(t)}/\Delta - 1)$  with all auxiliary speeds  $s_{j(t)}^{\text{aux}}(t), s_{j(t)}^{\text{aux}}(t + 1), \dots, s_{j(t)}^{\text{aux}}(t + \delta D_{j(t)}/\Delta - 1)$  set to  $s^{\text{base}}(t) - s^{\text{aux}}(t)$ .

This completes the formal description of GENERAL-ROBUSTIFY. Before proceeding to its analysis, which implies Theorem 25, we explain the example depicted in Figure 4. Schedule  $s$ , illustrated on the left, schedules a blue, red, and green job during the first, second, and third time interval, respectively. We have that  $\delta/\Delta$  times the duration of the blue job and the red job are 3 and 4, respectively. GENERAL-ROBUSTIFY now produces the schedule on the right where the auxiliary parts are indicated by the horizontal stripes. When the blue job is scheduled it is partitioned among the base part of the first interval and evenly among the auxiliary parts of the first, second and third intervals so that the speed at the first interval is the same in the base part and auxiliary part. Similarly, when the red job is scheduled, GENERAL-ROBUSTIFY splits it among the base part of the second interval and evenly among the auxiliary part of the second, third, fourth and fifth intervals so that the speed during the base part equals the speed at the auxiliary part during the second interval. Finally, the green job is processed at a small speed and is thus only scheduled in the base part of the third interval (with a speed increased by a factor  $1/(1 - \delta)$ ).

**Analysis.** We show that GENERAL-ROBUSTIFY satisfies the guarantees stipulated by Theorem 25. We first argue that GENERAL-ROBUSTIFY produces a feasible schedule to  $\mathcal{J}$ . During the  $t$ :th interval, the schedule  $s$  computed by  $\mathcal{A}$  processes  $\Delta \cdot s(t)$  work of job  $j(t)$ . We argue that GENERAL-ROBUSTIFY processes the same amount of work from this time interval. At the time when this interval is considered by GENERAL-ROBUSTIFY, there are two cases:

- If  $s(t)/(1 - \delta) \leq s^{\text{aux}}(t)$  then  $s^{\text{base}}(t) = s(t)/(1 - \delta)$  so GENERAL-ROBUSTIFY processes  $(1 - \delta)\Delta s(t)/(1 - \delta) = s(t)\Delta$  work of  $j(t)$  during the base part of the  $t$ :th time interval.

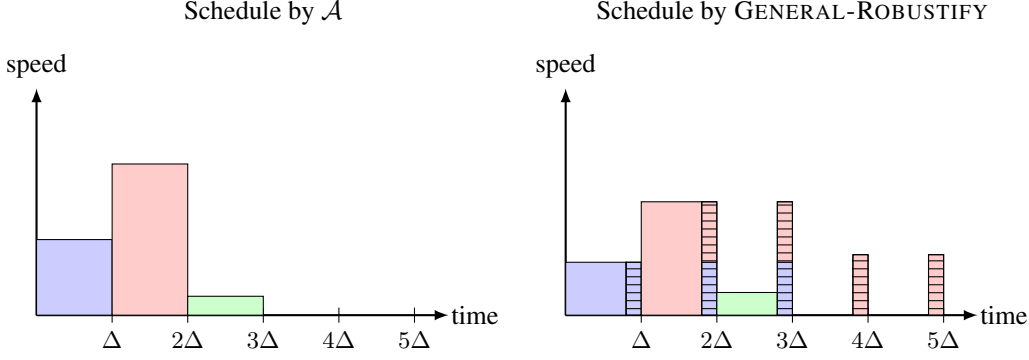

Figure 4: Given the schedule on the left, GENERAL-ROBUSTIFY produces the schedule on the right.

- Otherwise, we have that GENERAL-ROBUSTIFY processes  $(1 - \delta)\Delta s^{\text{base}}(t)$  of  $j(t)$  during the base part of the  $t$ :th time interval and  $\delta\Delta (s^{\text{base}}(t) - s^{\text{aux}}(t))$  during the auxiliary part of each of the  $\delta D_{j(t)}/\Delta$  time intervals  $t, t + 1, \dots, t + \delta D_{j(t)}/\Delta - 1$ . By the selection (9), it thus follows that GENERAL-ROBUSTIFY processes all work  $s(t)\Delta$  from this time interval. in this case as well.

The schedule of GENERAL-ROBUSTIFY thus completely processes every job. Furthermore, since each job is delayed at most  $\delta D_{j(t)}$  time steps we have that it is a feasible schedule to  $\mathcal{J}$  since we started with a schedule for  $\mathcal{J}^\delta$ , which completes each job  $j$  by time  $r_j + (1 - \delta)D_j$ . It remains to prove the robustness and soundness guarantees of Theorem 25

**Lemma 27** (Robustness). GENERAL-ROBUSTIFY computes a schedule of cost at most  $(2\alpha/\delta^2)^\alpha/2 \cdot \text{OPT}$ .

*Proof.* By the definition of the algorithm we have, for each time interval, that the speed of the base part is at most the speed of the auxiliary part. Letting  $s^{\text{base}}(t)$  and  $s^{\text{aux}}(t)$  denote the speed of the base and auxiliary part of the  $t$ :th time interval, we thus have

$$\sum_t ((1 - \delta)s^{\text{base}}(t)^\alpha + \delta s^{\text{aux}}(t)^\alpha) \leq \sum_t s^{\text{aux}}(t)^\alpha.$$

Now we have that the part of a job  $j$  that is processed during the auxiliary part of a time interval has been uniformly assigned to at least  $\delta^2 D_j$  time steps. It follows that the speed at any auxiliary time interval is at most  $1/\delta^2$  times the speed at that time of the AVERAGE RATE heuristic (AVR). The lemma now follows since that heuristic is known [17] to have competitive ratio at most  $(2\alpha)^\alpha/2$ .  $\square$

**Lemma 28** (Consistency). GENERAL-ROBUSTIFY computes a schedule of cost at most  $\left(\frac{1}{1-\delta}\right)^{\alpha-1} \cdot C$  where  $C$  denotes the cost of the schedule  $s$  computed by  $\mathcal{A}$ .

*Proof.* For  $t \geq 0$ , let  $h^{(t)}$  be the schedule that processes the workload during the first  $t$  time intervals as in the schedule computed by GENERAL-ROBUSTIFY, and the workload of the remaining time intervals is processed during the base part of that time interval by increasing the speed by a factor  $1/(1 - \delta)$ . Hence,  $h^{(0)}$  is the schedule that processes the workload of all time intervals during the base part at a speed up of  $1/(1 - \delta)$ , and  $h^{(\infty)}$  equals the schedule produced by GENERAL-ROBUSTIFY. By definition, the cost of  $h^{(0)}$  equals  $\left(\frac{1}{1-\delta}\right)^\alpha (1 - \delta) \cdot C$  and so the lemma follows by observing that for every  $t \geq 1$  the cost of  $h^{(t)}$  is at most the cost of  $h^{(t-1)}$ . To see this consider the two cases of GENERAL-ROBUSTIFY when considering the  $t$ :th time interval:

- If  $s(t)/(1 - \delta) \leq s^{\text{aux}}(t)$  then GENERAL-ROBUSTIFY processes all the workload during the base part at a speed of  $s^{\text{base}}(t) = s(t)/(1 - \delta)$ . Hence, in this case, the schedules  $h^{(t)}$  and  $h^{(t-1)}$  processes the workload of the  $t$ :th time interval identically and so they have equal costs.

- Otherwise, GENERAL-ROBUSTIFY partitions the workload of the  $t$ :th time interval among the base part of the  $t$ :th interval and  $\delta D_{j(t)}/\Delta$  many auxiliary parts so that the speed at each of these parts is strictly less than  $s(t)/(1-\delta)$ . Hence, since  $h^{(t)}$  processes the workload of the  $t$ :th time interval at a lower speed than  $h^{(t-1)}$  we have that its cost is strictly lower if  $\alpha > 1$  (and the cost is equal if  $\alpha = 1$ ).

□

## I Additional Experiments

In this section we further explore the performance of LAS algorithm for different values of the parameter  $\alpha$ . We conduct experiments on the login requests of *BrightKite* using the same experimental setup used in Section 4. The results are summarized in Table 2. In every column the average competitive ratios of each algorithm for a fixed  $\alpha$  are presented. We note that, as expected, higher values of  $\alpha$  penalize heavily wrong decisions deteriorating the competitive ratios of all algorithms. Nevertheless, LAS algorithm consistently outperforms AVR and OA for all different values of  $\alpha$ .

Table 2: Real dataset results with different  $\alpha$  values

| Algorithm                 | $\alpha = 3$ | $\alpha = 6$ | $\alpha = 9$ | $\alpha = 12$ |
|---------------------------|--------------|--------------|--------------|---------------|
| AVR                       | 1.365        | 2.942        | 7.481        | 21.029        |
| OA                        | 1.245        | 2.211        | 4.513        | 9.938         |
| LAS, $\varepsilon = 0.8$  | 1.113        | 1.576        | 2.806        | 7.204         |
| LAS, $\varepsilon = 0.01$ | 1.116        | 1.598        | 2.918        | 8.055         |

The timeline was discretized in chunks of ten minutes and  $D$  was set to 20.
